# Supplementary material
Source: publisher figshare collection journal article supplement (https://acs.figshare.com/ndownloader/files/15475364)
Supplement: Supplementary file 1 [file 15475364]

## FIGURE LEGENDS

- Figure S1.  $^1\text{H}$  NMR (600 MHz,  $\text{CD}_3\text{OD}$ ) spectrum of the new compound 1
- Figure S2.  $^{13}\text{C}$  NMR (150 MHz,  $\text{CD}_3\text{OD}$ ) spectrum of the new compound 1
- Figure S3.  $^1\text{H}$ - $^1\text{H}$  COSY NMR (600 MHz,  $\text{CD}_3\text{OD}$ ) spectrum of the new compound 1
- Figure S4. HMQC NMR (600 MHz,  $\text{CD}_3\text{OD}$ ) spectrum of the new compound 1
- Figure S5. HMBC NMR (600 MHz,  $\text{CD}_3\text{OD}$ ) spectrum of the new compound 1
- Figure S6. HRESIMS spectrum of the new compound 1
- Figure S7. HRESIMS data of the new compound 1
- Figure S8. ESIMS (in-source fragmentation) spectrum of compound 1
- Figure S9.  $^1\text{H}$  NMR (600 MHz,  $\text{CD}_3\text{OD}$ ) spectrum of the new compound 2
- Figure S10.  $^{13}\text{C}$  NMR (150 MHz,  $\text{CD}_3\text{OD}$ ) spectrum of the new compound 2
- Figure S11.  $^1\text{H}$ - $^1\text{H}$  COSY NMR (600 MHz,  $\text{CD}_3\text{OD}$ ) spectrum of the new compound 2
- Figure S12. HMQC NMR (600 MHz,  $\text{CD}_3\text{OD}$ ) spectrum of the new compound 2
- Figure S13. HMBC NMR (600 MHz,  $\text{CD}_3\text{OD}$ ) spectrum of the new compound 2
- Figure S14. HRESIMS spectrum of the new compound 2
- Figure S15. HRESIMS data of the new compound 2
- Figure S16. ESIMS (in-source fragmentation) spectrum of compound 2
- Figure S17.  $^1\text{H}$  NMR (600 MHz,  $\text{CD}_3\text{OD}$ ) spectrum of the new compound 3
- Figure S18.  $^{13}\text{C}$  NMR (150 MHz,  $\text{CD}_3\text{OD}$ ) spectrum of the new compound 3
- Figure S19.  $^1\text{H}$ - $^1\text{H}$  COSY NMR (600 MHz,  $\text{CD}_3\text{OD}$ ) spectrum of the new compound 3
- Figure S20. HMQC NMR (600 MHz,  $\text{CD}_3\text{OD}$ ) spectrum of the new compound 3
- Figure S21. HMBC NMR (600 MHz,  $\text{CD}_3\text{OD}$ ) spectrum of the new compound 3
- Figure S22. HRESIMS spectrum of the new compound 3
- Figure S23. HRESIMS data of the new compound 3

Figure S24. ESIMS (in-source fragmentation) spectrum of compound 3

Figure S25.  $^1\text{H}$  NMR (600 MHz,  $\text{CD}_3\text{OD}$ ) spectrum of the new compound 4

Figure S26.  $^{13}\text{C}$  NMR (150 MHz,  $\text{CD}_3\text{OD}$ ) spectrum of the new compound 4

Figure S27.  $^1\text{H}$ - $^1\text{H}$  COSY NMR (600 MHz,  $\text{CD}_3\text{OD}$ ) spectrum of the new compound 4

Figure S28. HMQC NMR (600 MHz,  $\text{CD}_3\text{OD}$ ) spectrum of the new compound 4

Figure S29. HMBC NMR (600 MHz,  $\text{CD}_3\text{OD}$ ) spectrum of the new compound 4

Figure S30. HRESIMS spectrum of the new compound 4

Figure S31. HRESIMS data of the new compound 4

Figure S32. ESIMS (in-source fragmentation) spectrum of compound 4

Figure S33.  $^1\text{H}$  NMR (600 MHz, DMSO) spectrum of the new compound 5

Figure S34.  $^{13}\text{C}$  NMR (150 MHz, DMSO) spectrum of the new compound 5

Figure S35. HRESIMS spectrum of the new compound 5

Figure S36. HRESIMS data of the new compound 5

Figure S1.  $^1\text{H}$  NMR (600 MHz,  $\text{CD}_3\text{OD}$ ) spectrum of the new compound 1

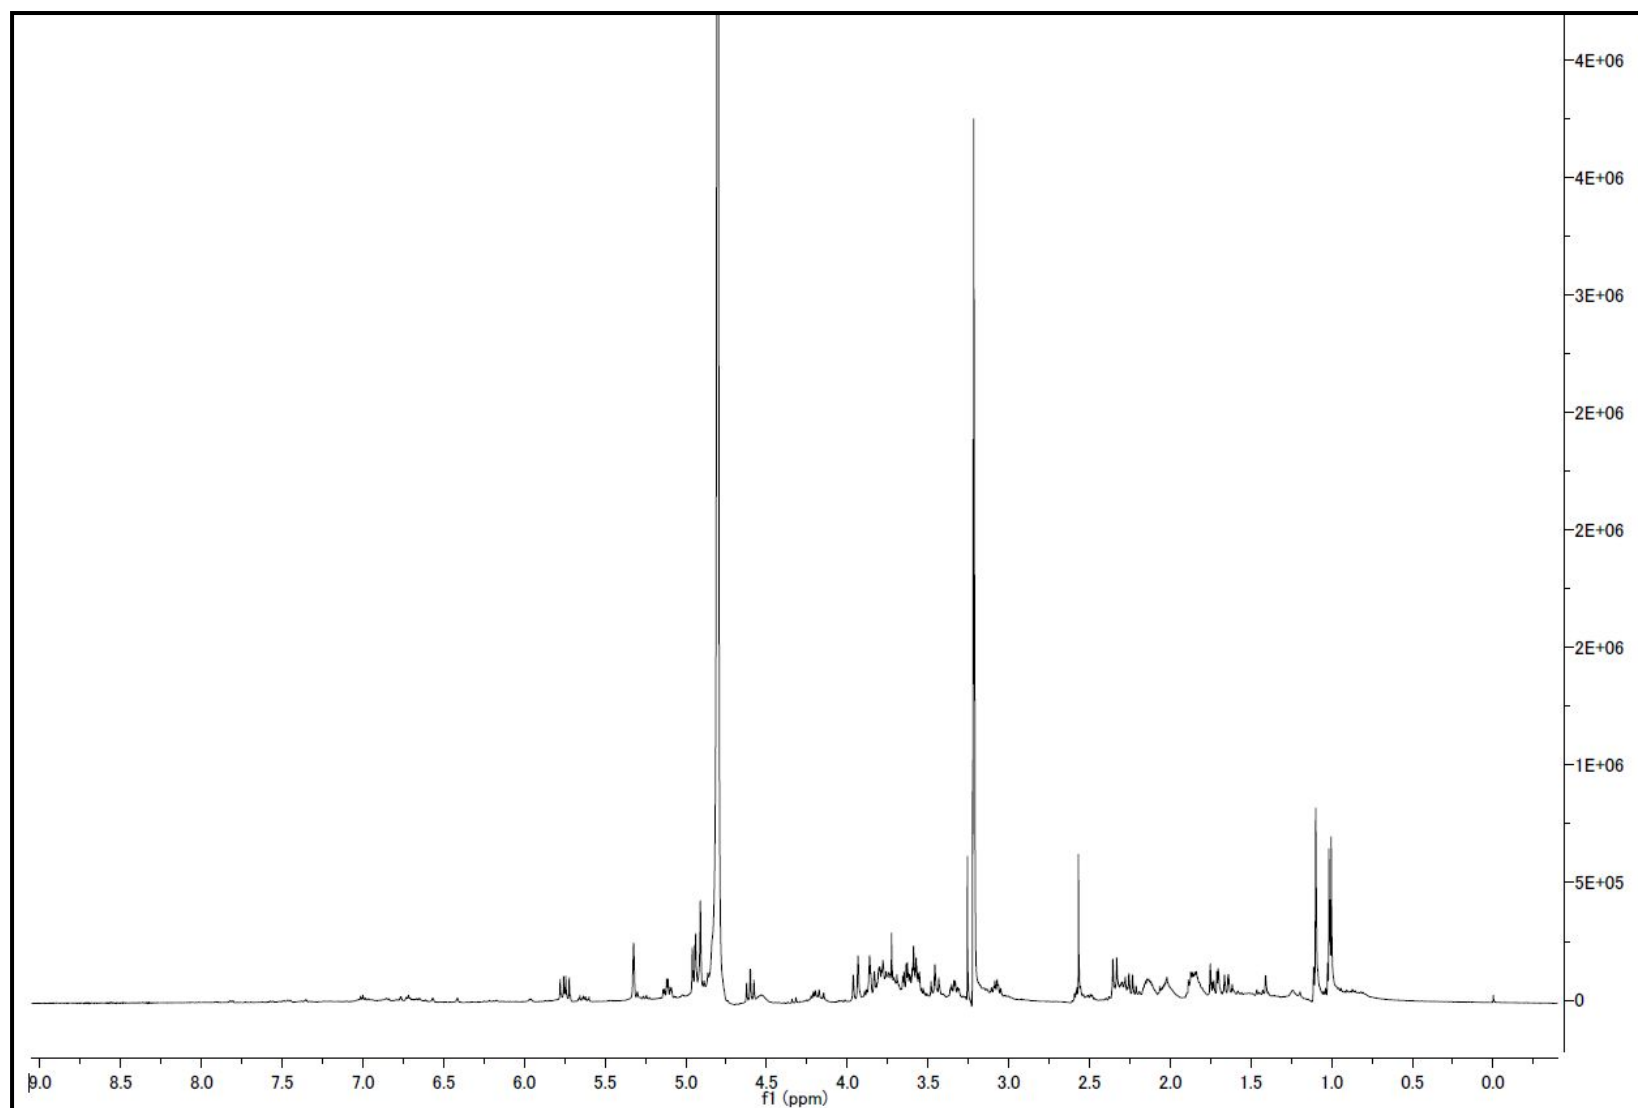



Figure S2.  $^{13}\text{C}$  NMR (150 MHz,  $\text{CD}_3\text{OD}$ ) spectrum of the new compound 1

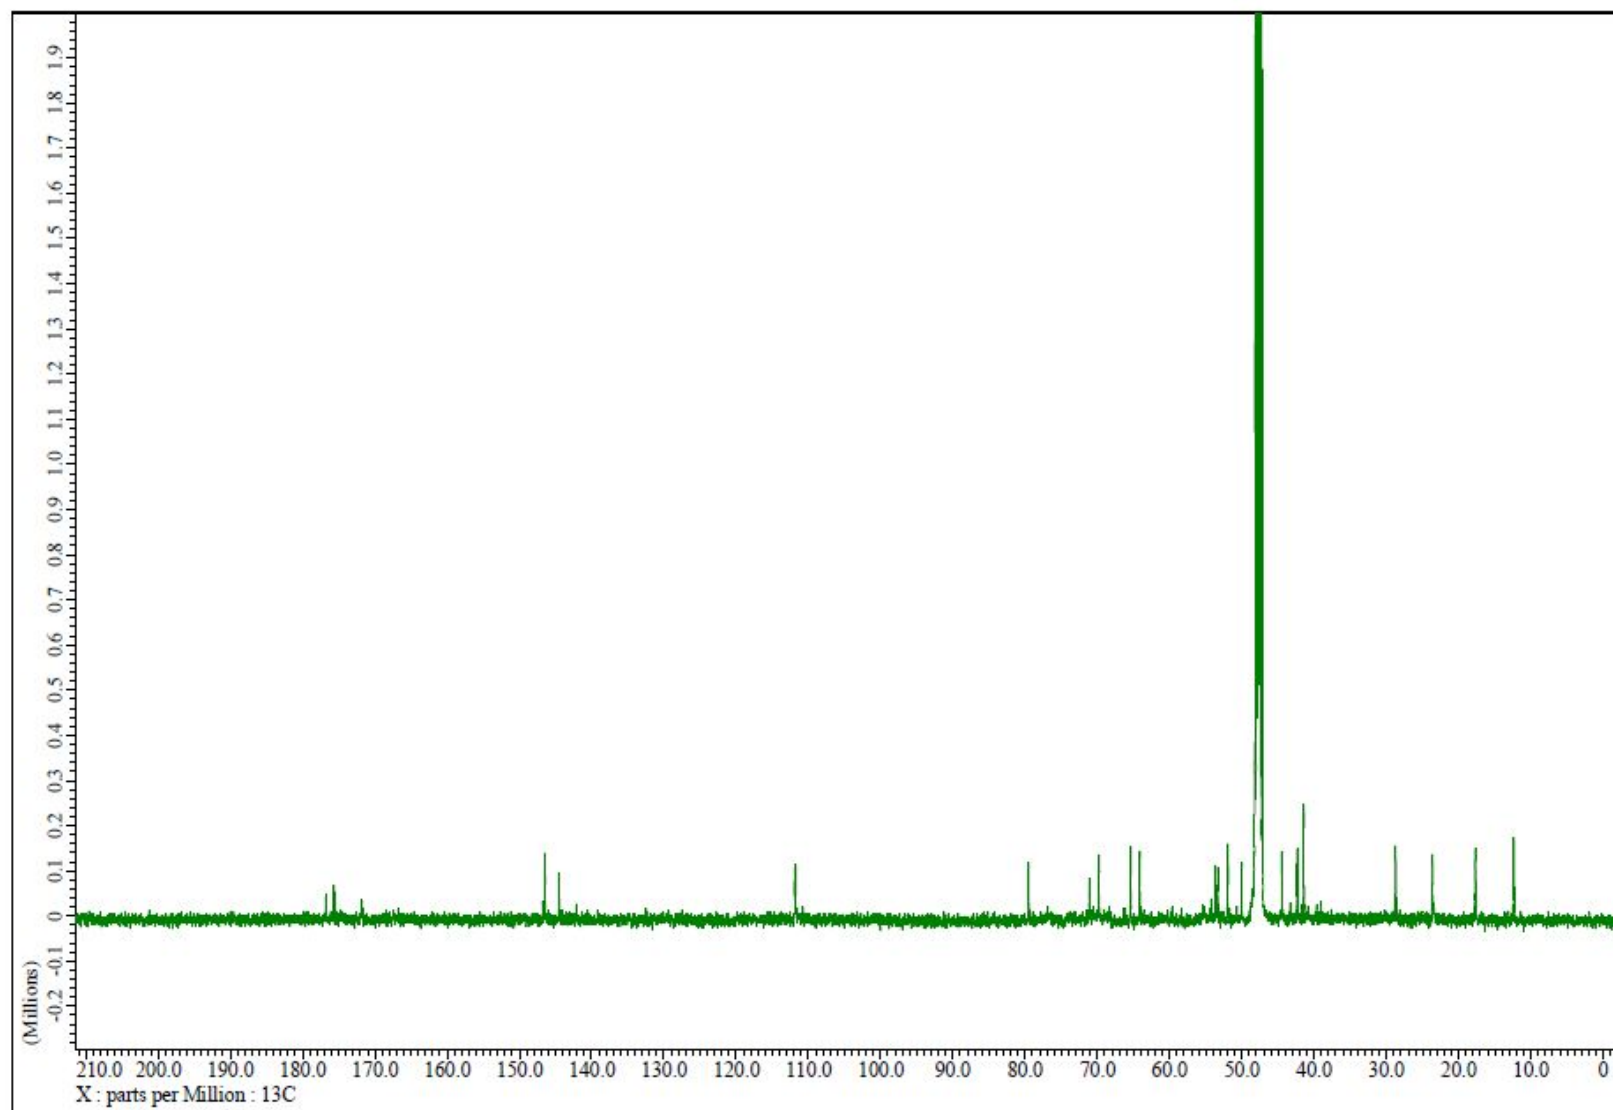

Figure S3.  $^1\text{H}$ - $^1\text{H}$  COSY NMR (600 MHz,  $\text{CD}_3\text{OD}$ ) spectrum of the new compound 1

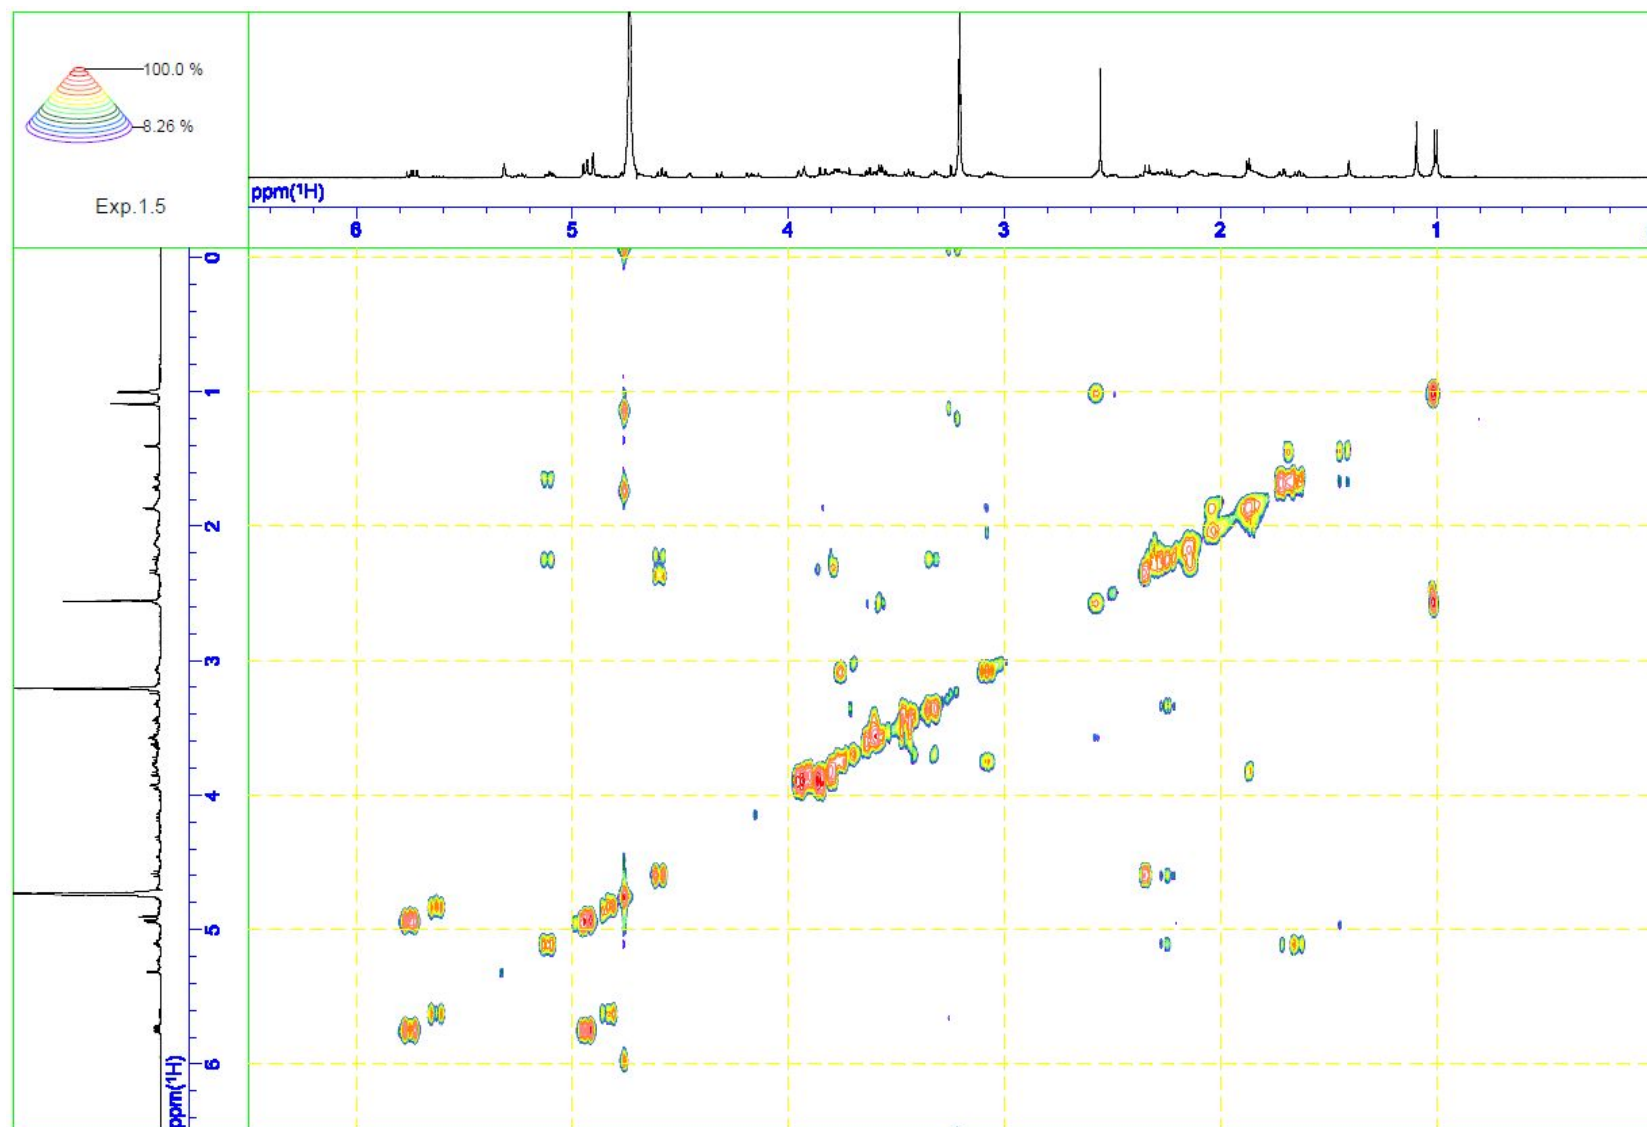

Figure S4. HMQC NMR (600 MHz, CD<sub>3</sub>OD) spectrum of the new compound 1

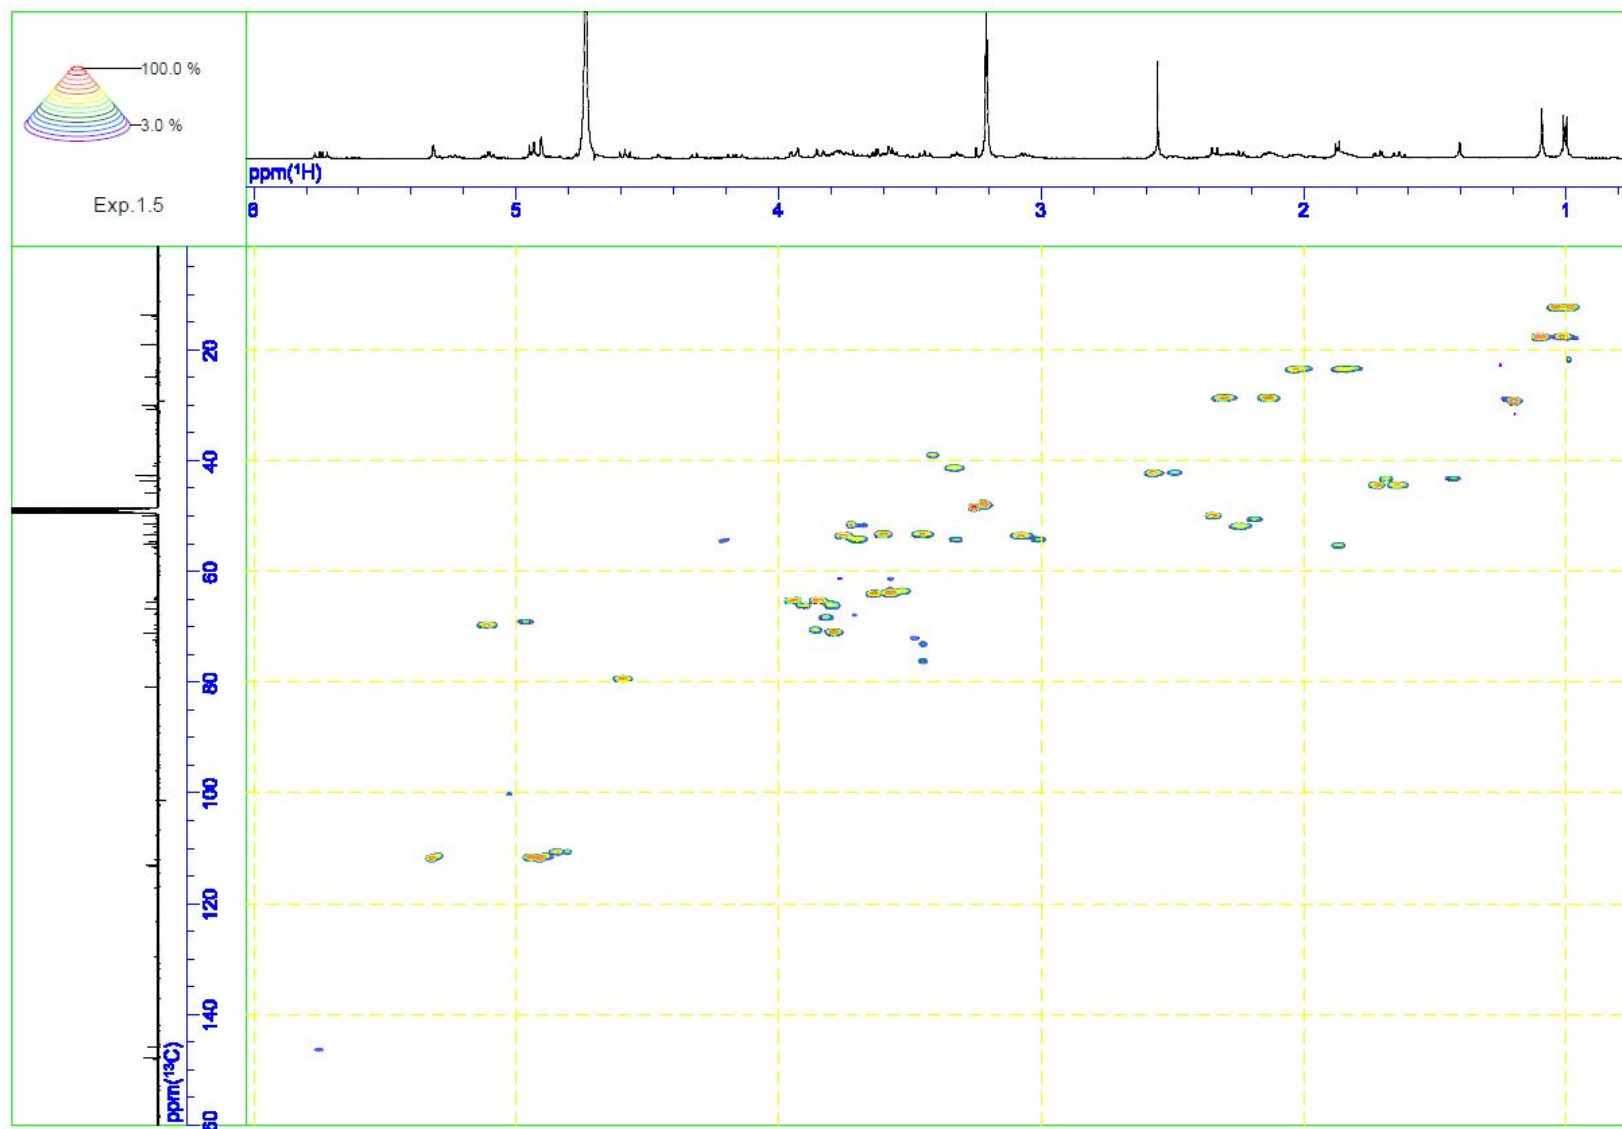

Figure S5. HMBC NMR (600 MHz, CD<sub>3</sub>OD) spectrum of the new compound 1

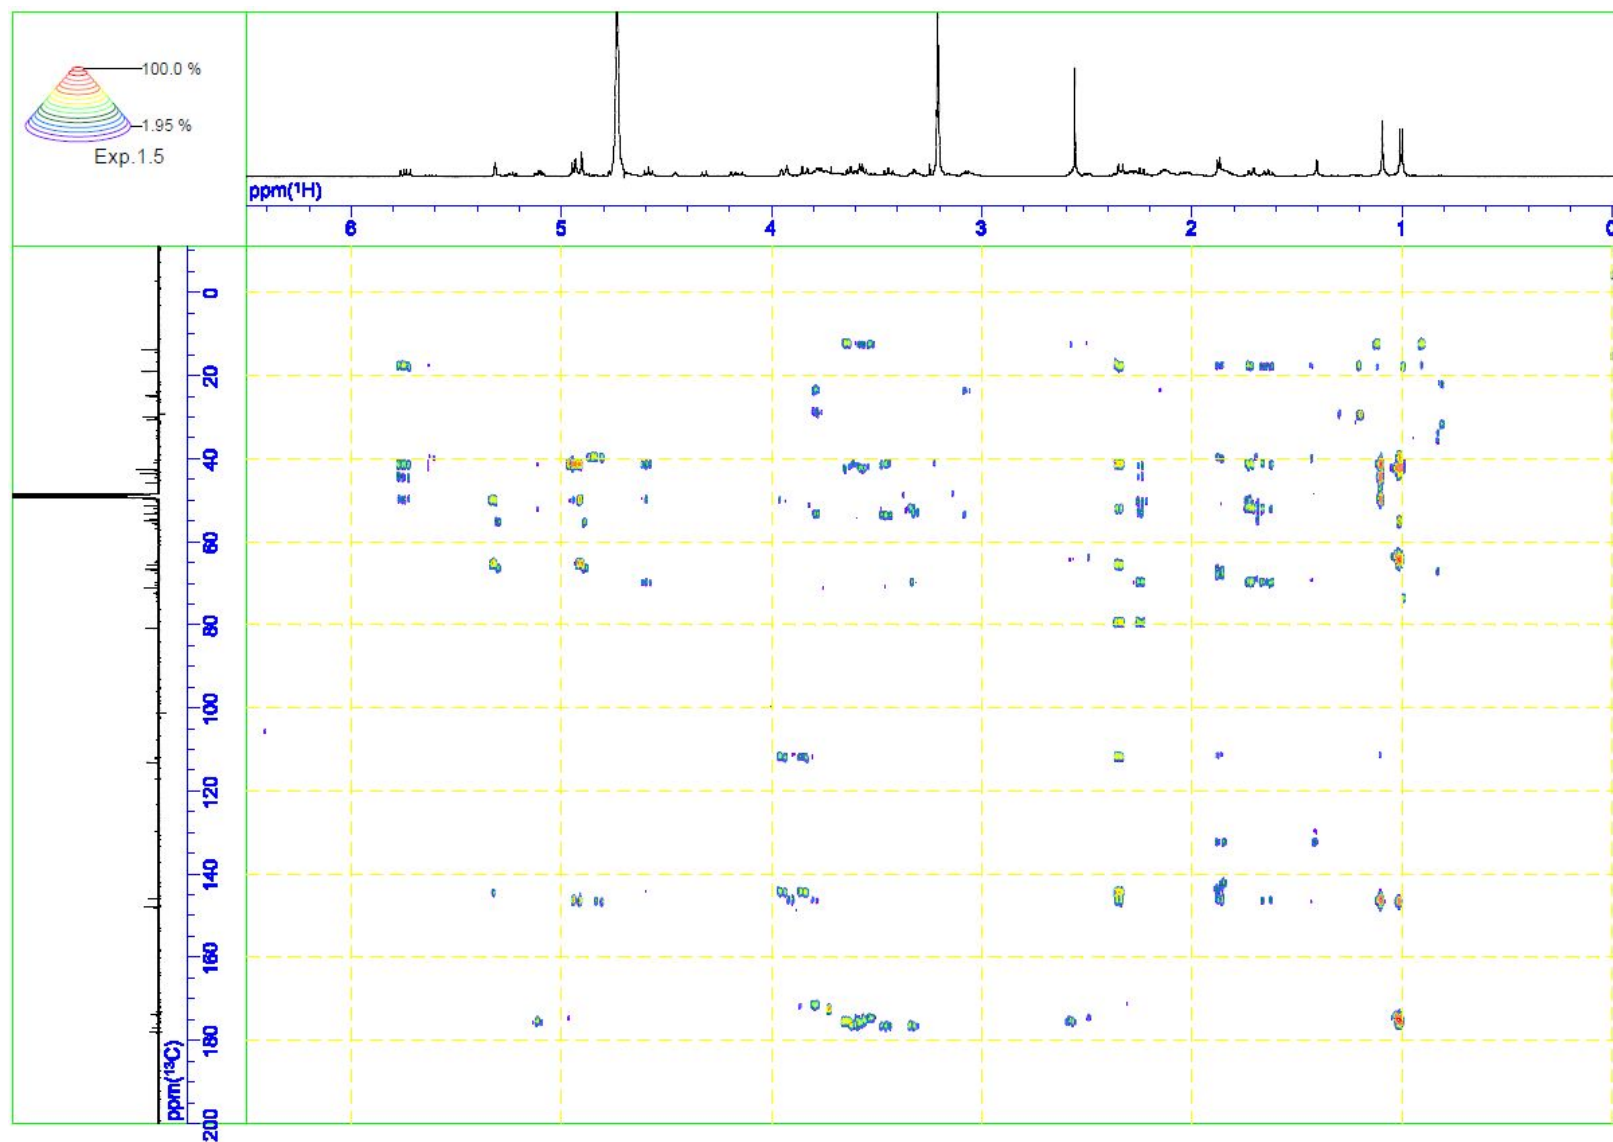

Figure S6. HRESIMS spectrum of the new compound 1

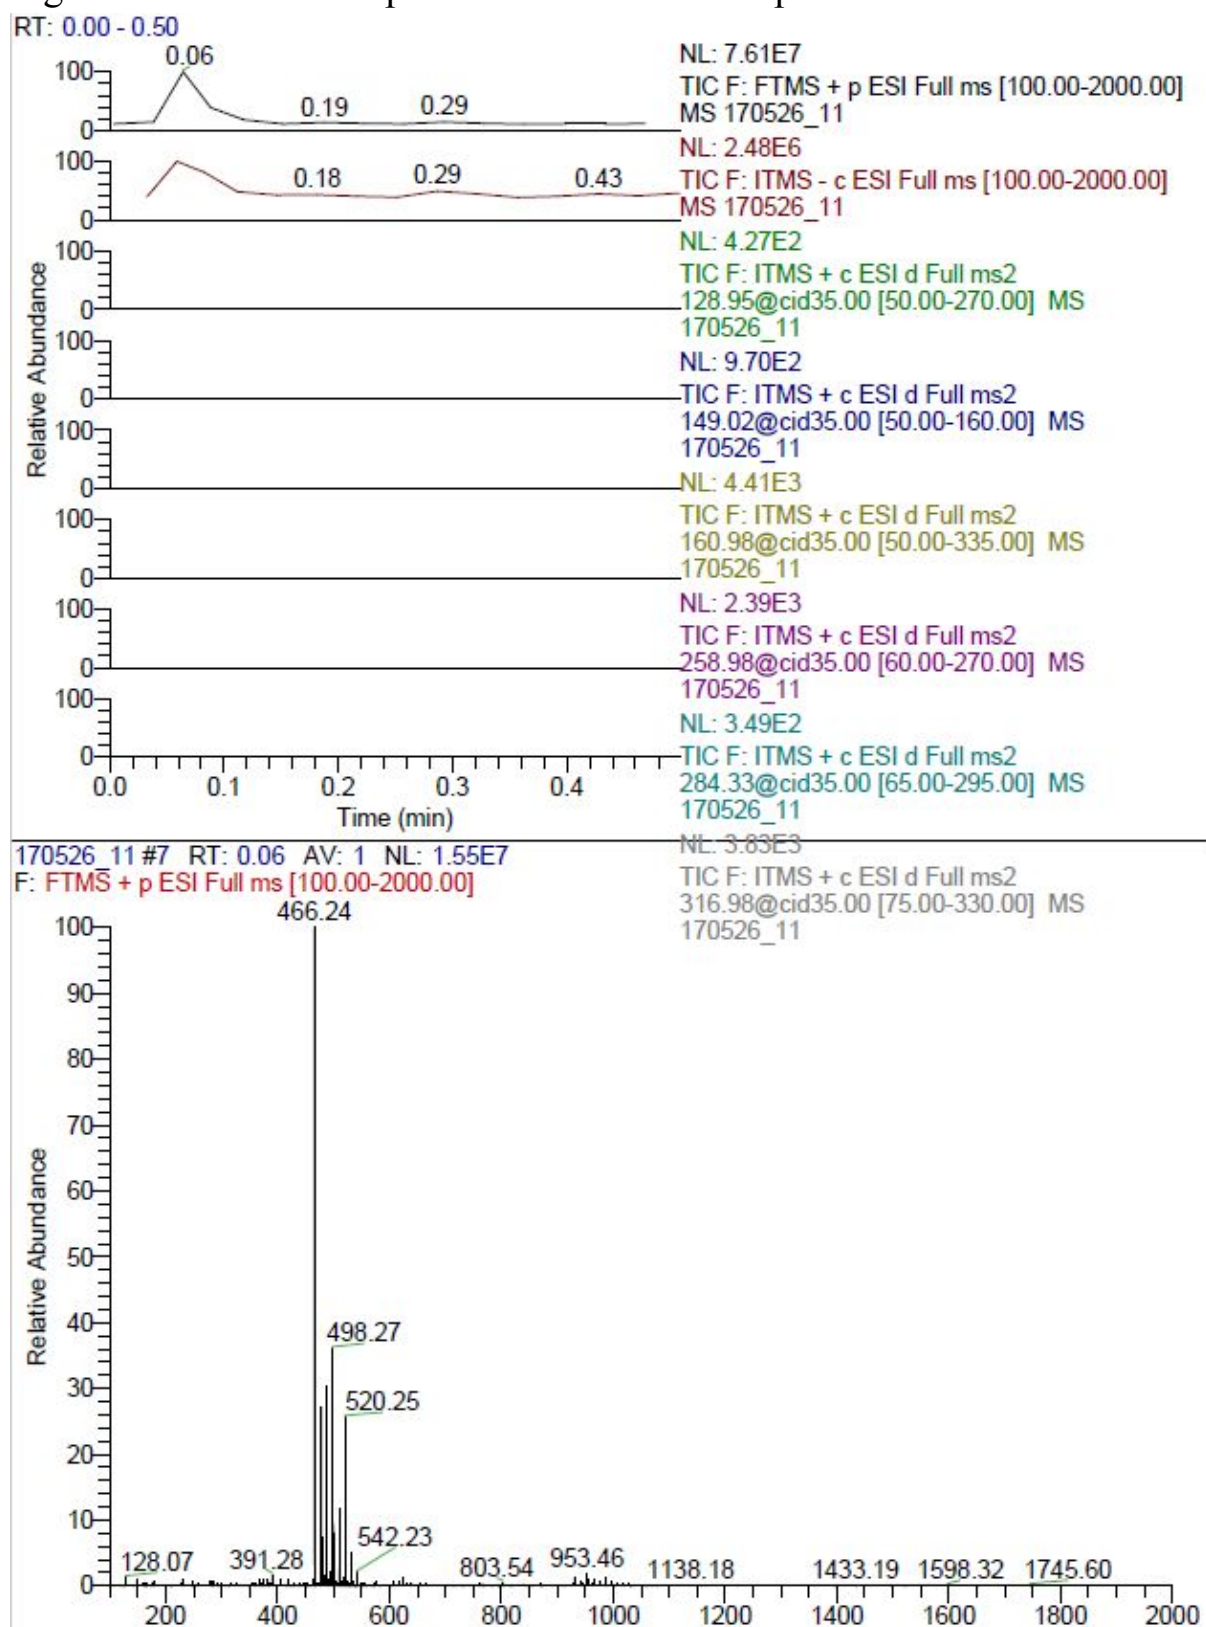

Figure S7. HRESIMS data of the new compound 1

Elemental composition search on mass 466.24

m/z= 461.24-471.24

| m/z      | Theo.<br>Mass | Delta<br>(ppm) | RDB<br>equiv. | Composition                                        |
|----------|---------------|----------------|---------------|----------------------------------------------------|
| 466.2436 | 466.2435      | 0.10           | 7.5           | C <sub>24</sub> H <sub>36</sub> O <sub>8</sub> N   |
|          | 466.2411      | 5.26           | 4.5           | C <sub>22</sub> H <sub>37</sub> O <sub>8</sub> NNa |
|          | 466.2409      | 5.85           | 3.0           | C <sub>21</sub> H <sub>38</sub> O <sub>11</sub>    |
|          | 466.2478      | -9.12          | 13.0          | C <sub>30</sub> H <sub>35</sub> O <sub>3</sub> Na  |
|          | 466.2385      | 11.01          | 0.0           | C <sub>19</sub> H <sub>39</sub> O <sub>11</sub> Na |
|          | 466.2353      | 17.86          | 13.5          | C <sub>29</sub> H <sub>33</sub> O <sub>3</sub> NNa |
|          | 466.2350      | 18.44          | 12.0          | C <sub>28</sub> H <sub>34</sub> O <sub>6</sub>     |
|          | 466.2537      | -21.71         | 4.0           | C <sub>23</sub> H <sub>39</sub> O <sub>8</sub> Na  |
|          | 466.2326      | 23.60          | 9.0           | C <sub>26</sub> H <sub>35</sub> O <sub>6</sub> Na  |
|          | 466.2561      | -26.87         | 7.0           | C <sub>25</sub> H <sub>38</sub> O <sub>8</sub>     |

Figure S8. ESIMS (in-source fragmentation) spectrum of compound 1

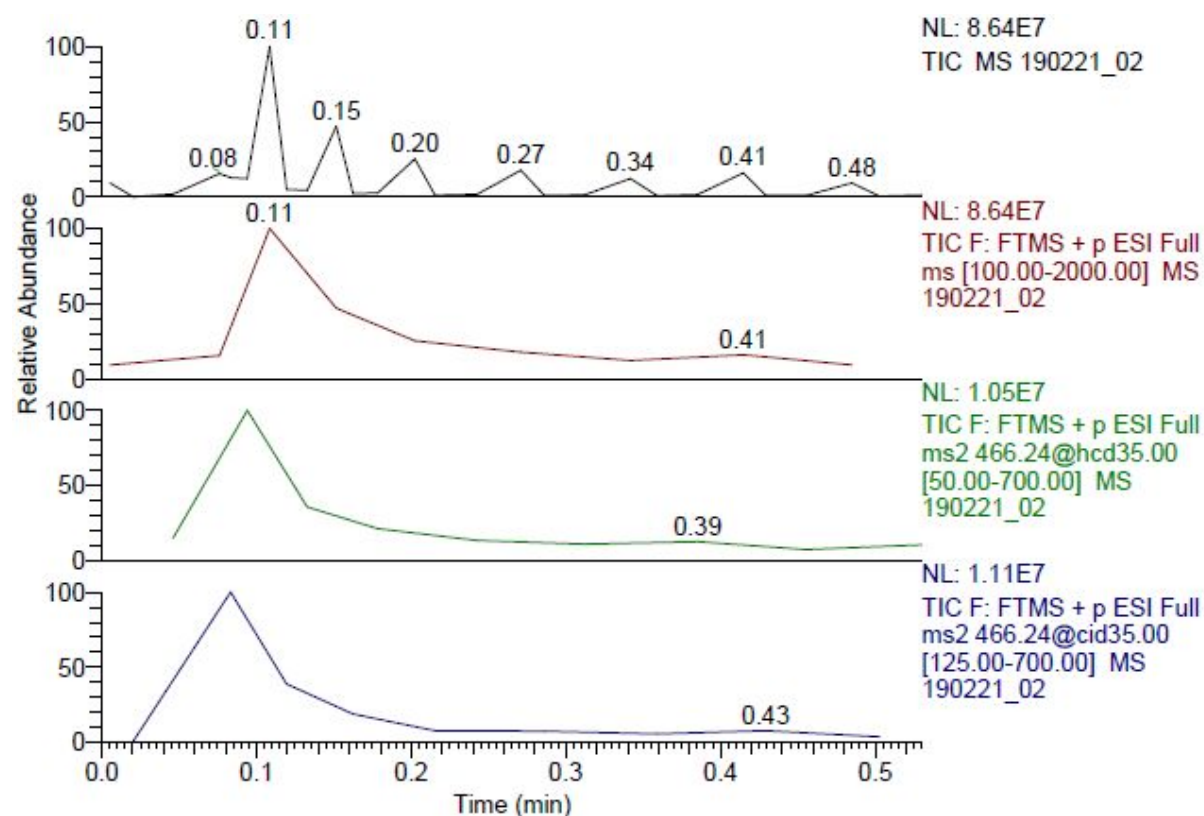

190221\_02 #3-8 RT: 0.05-0.09 AV: 2 NL: 2.05E6  
 ∴ FTMS + p ESI Full ms2 466.24@hcd35.00 [50.00-700.00]

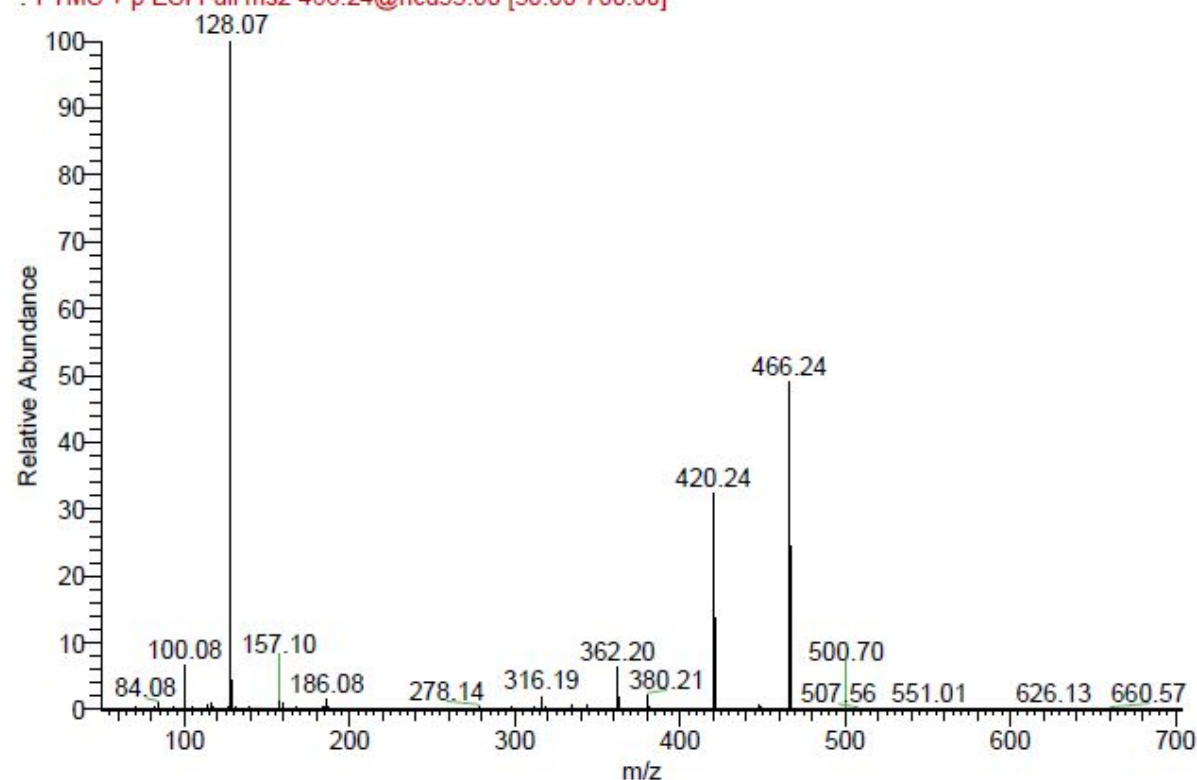

Figure S9.  $^1\text{H}$  NMR (600 MHz,  $\text{CD}_3\text{OD}$ ) spectrum of the new compound 2

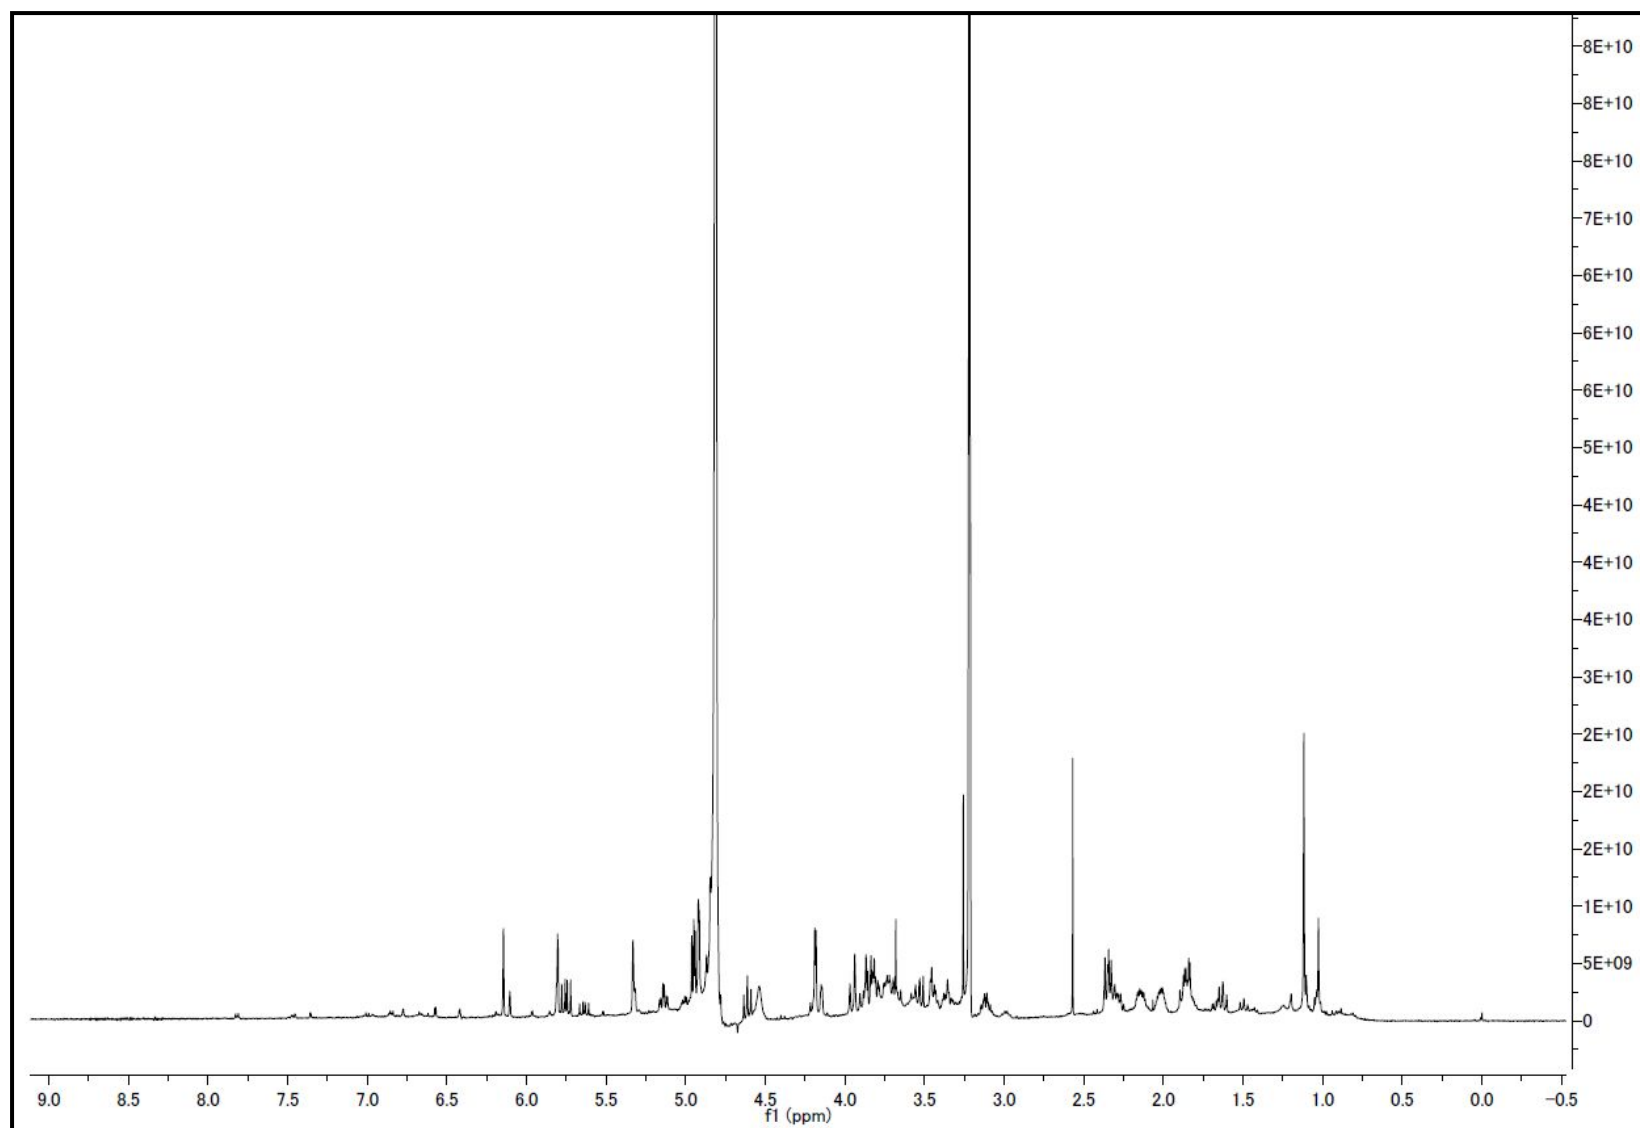

Figure S10.  $^{13}\text{C}$  NMR (150 MHz,  $\text{CD}_3\text{OD}$ ) spectrum of the new compound 2

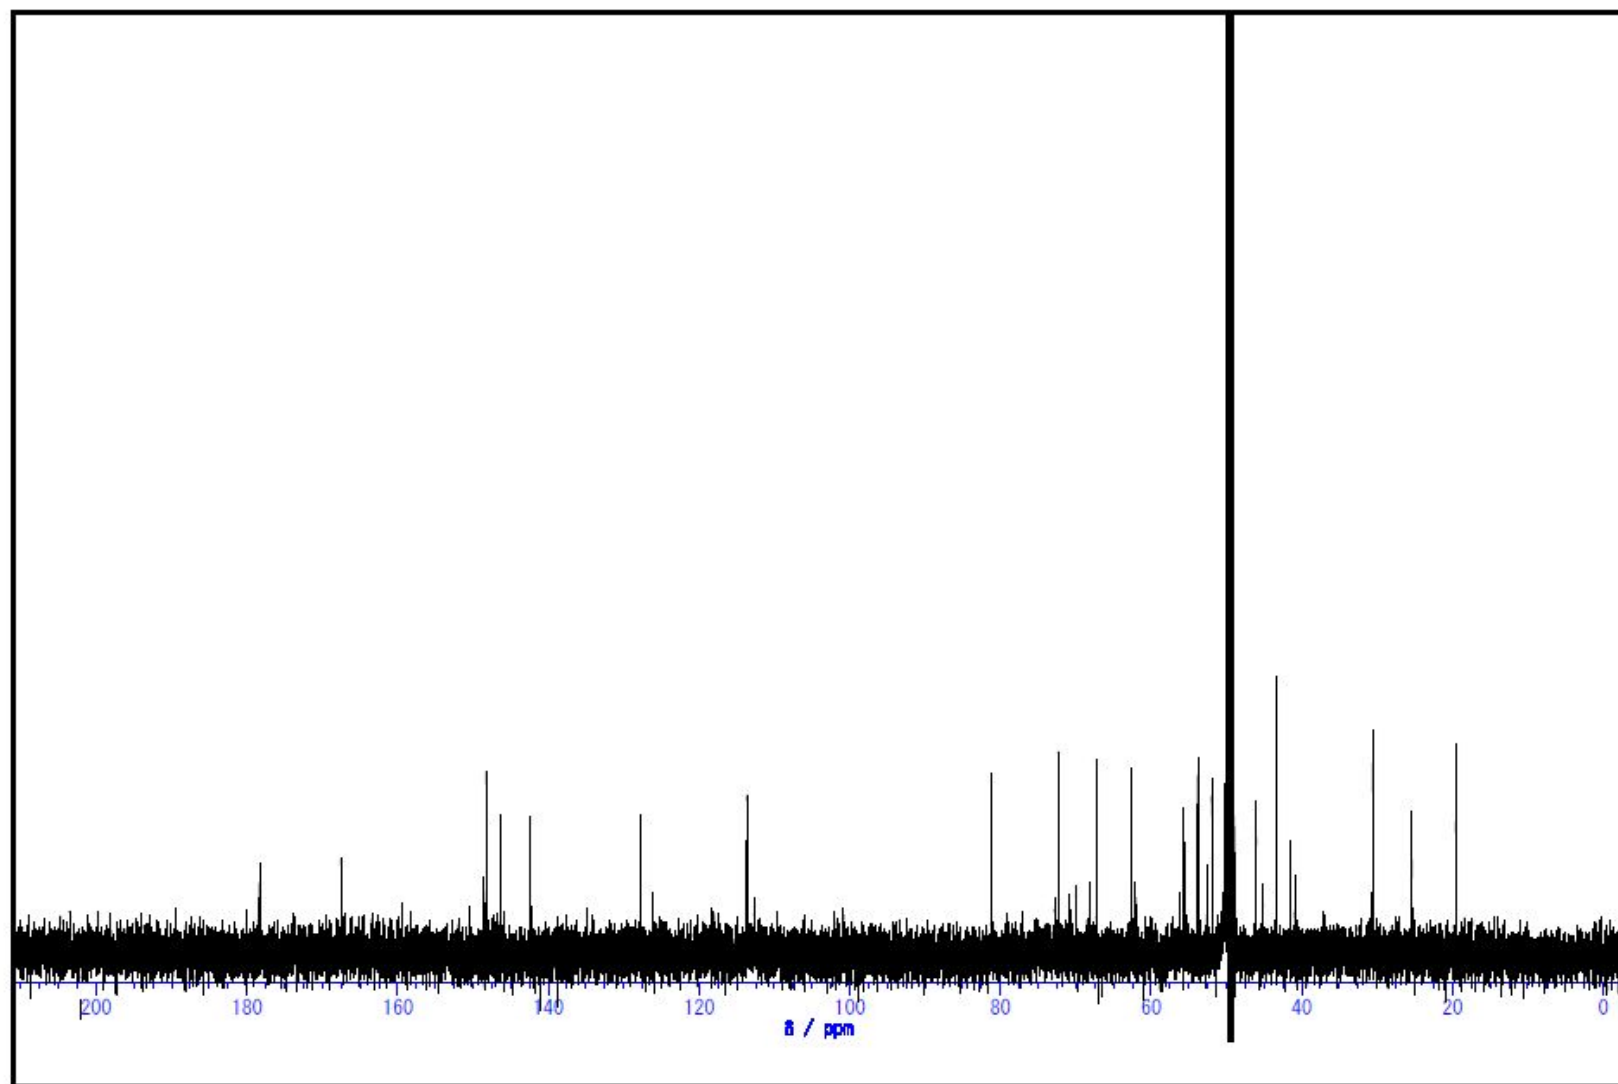

Figure S11.  $^1\text{H}$ - $^1\text{H}$  COSY NMR (600 MHz,  $\text{CD}_3\text{OD}$ ) spectrum of the new compound 2

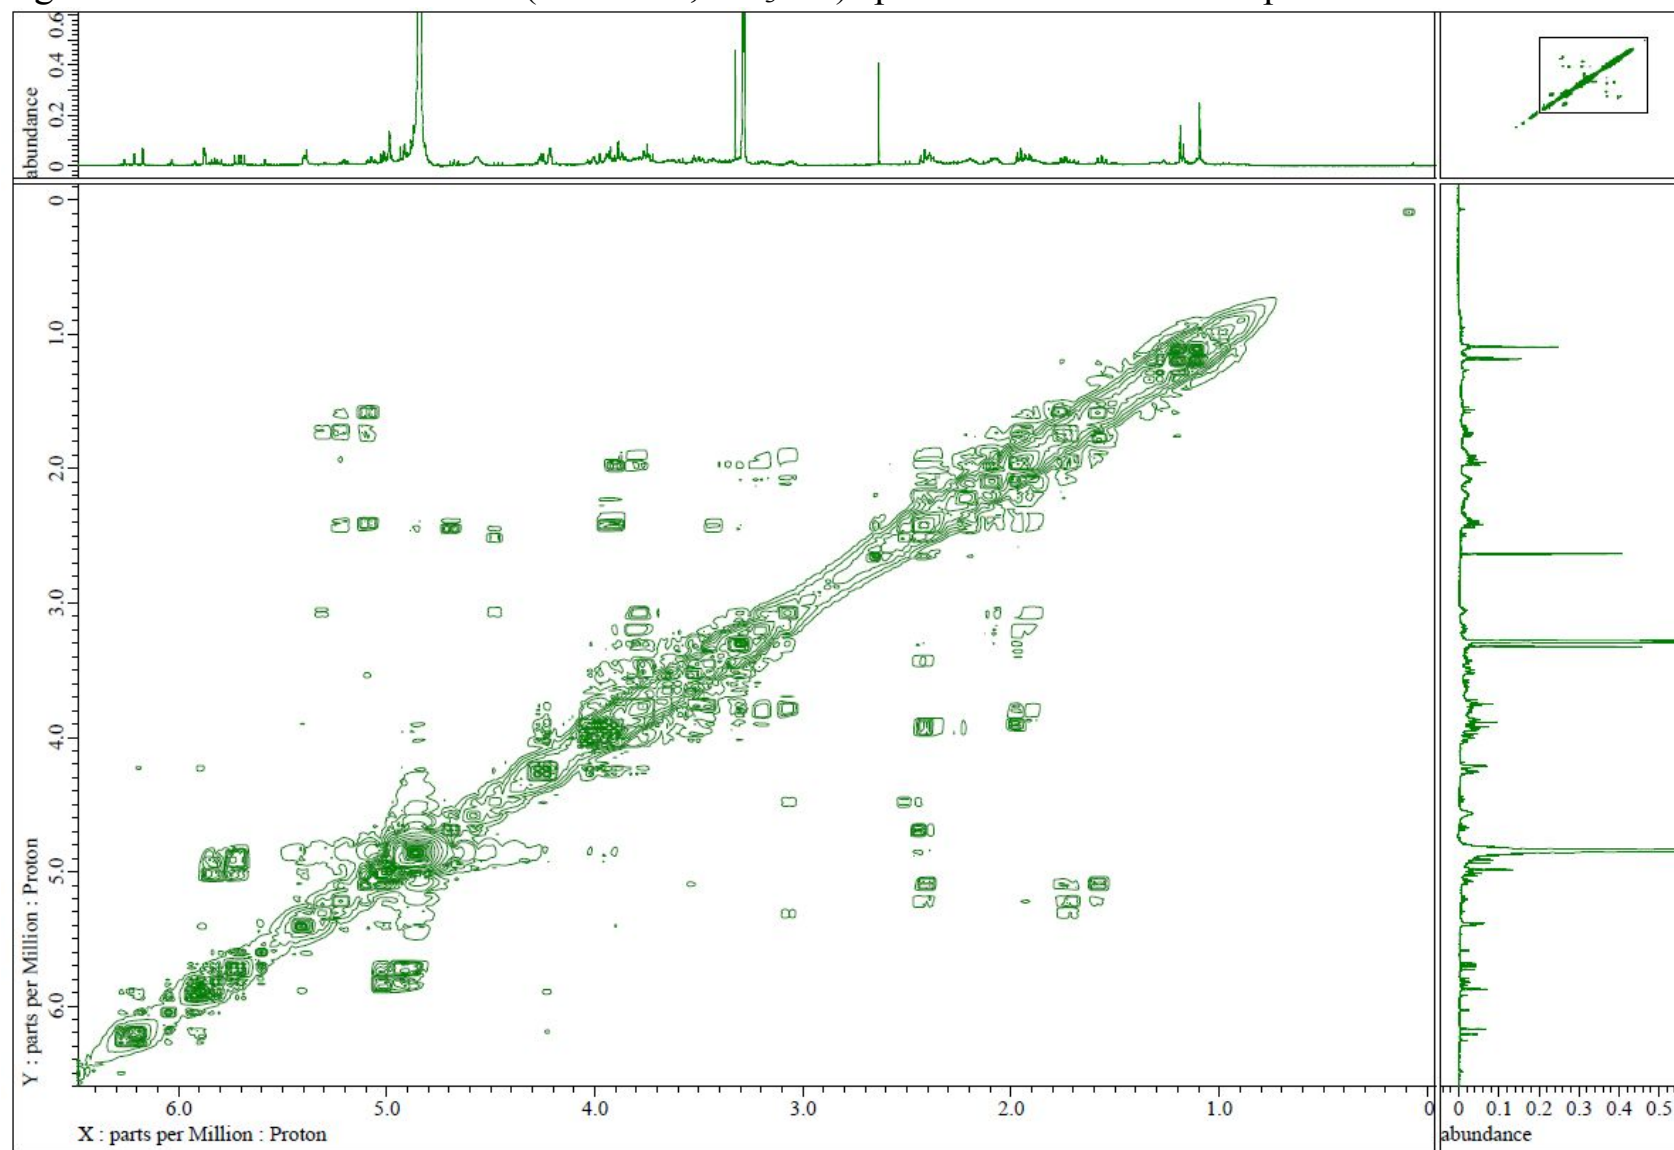

Figure S12. HMQC NMR (600 MHz, CD<sub>3</sub>OD) spectrum of the new compound 2

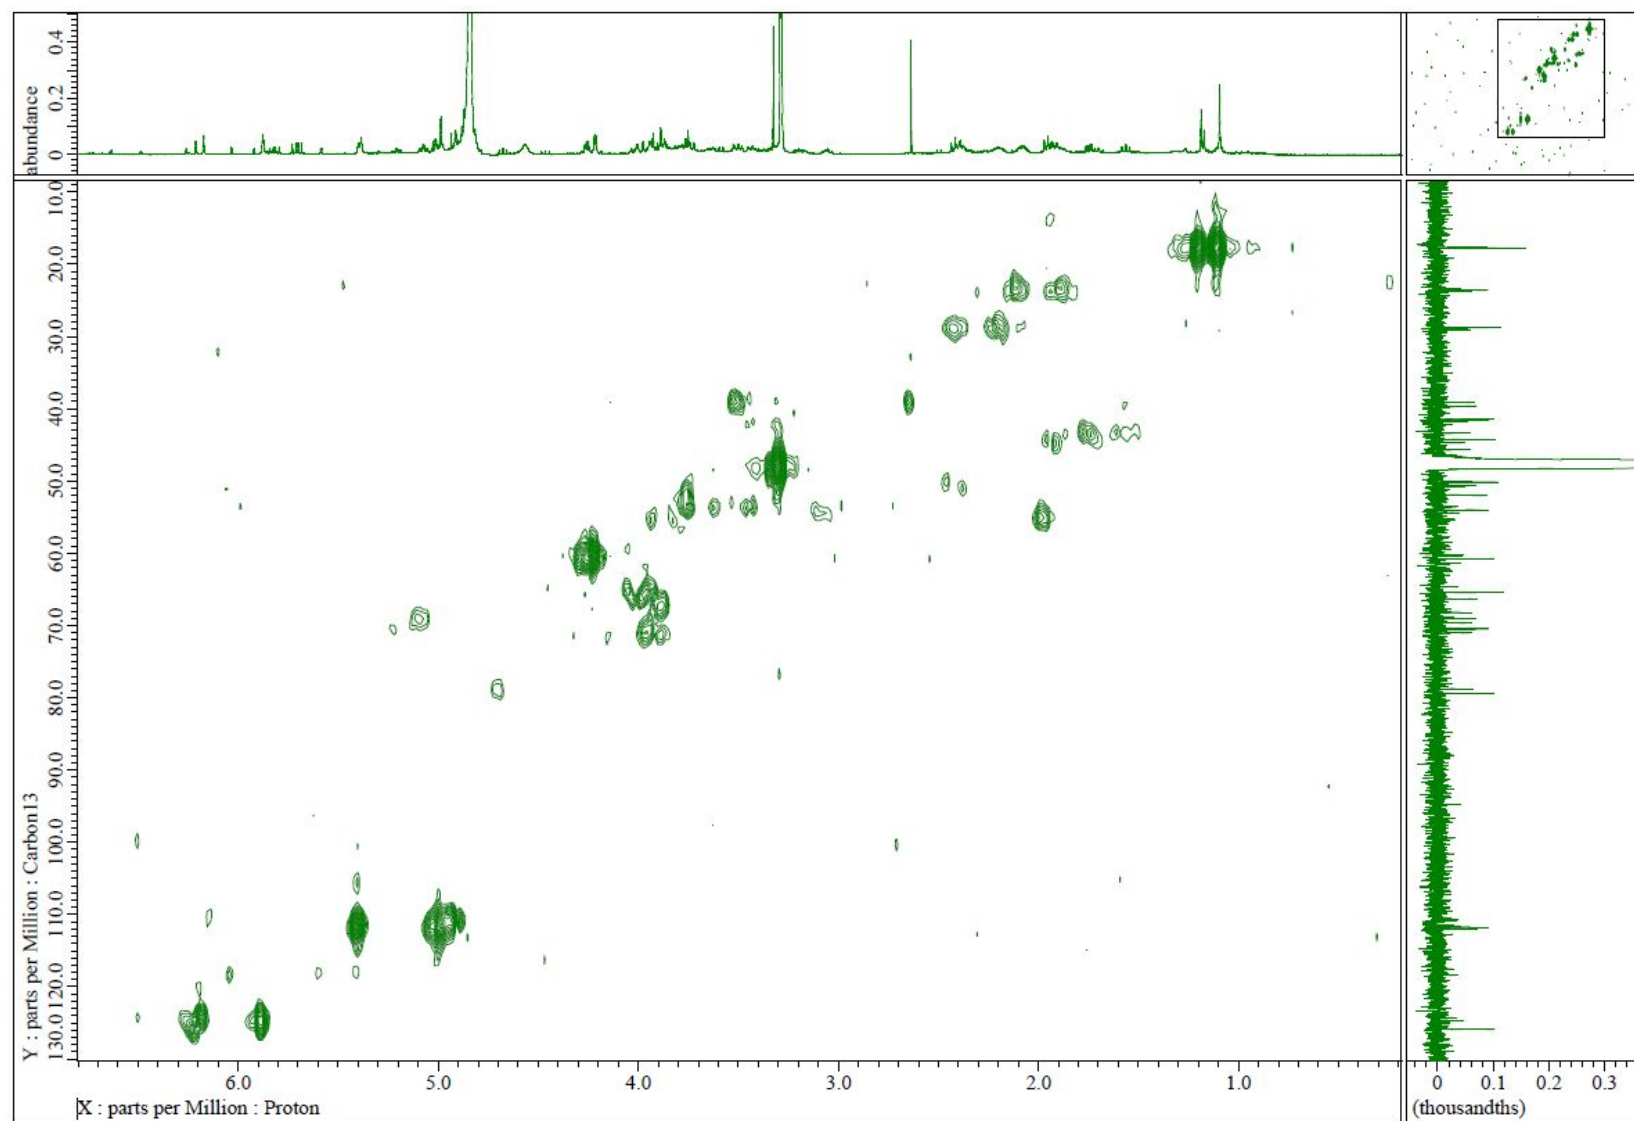

Figure S13. HMBC NMR (600 MHz, CD<sub>3</sub>OD) spectrum of the new compound 2

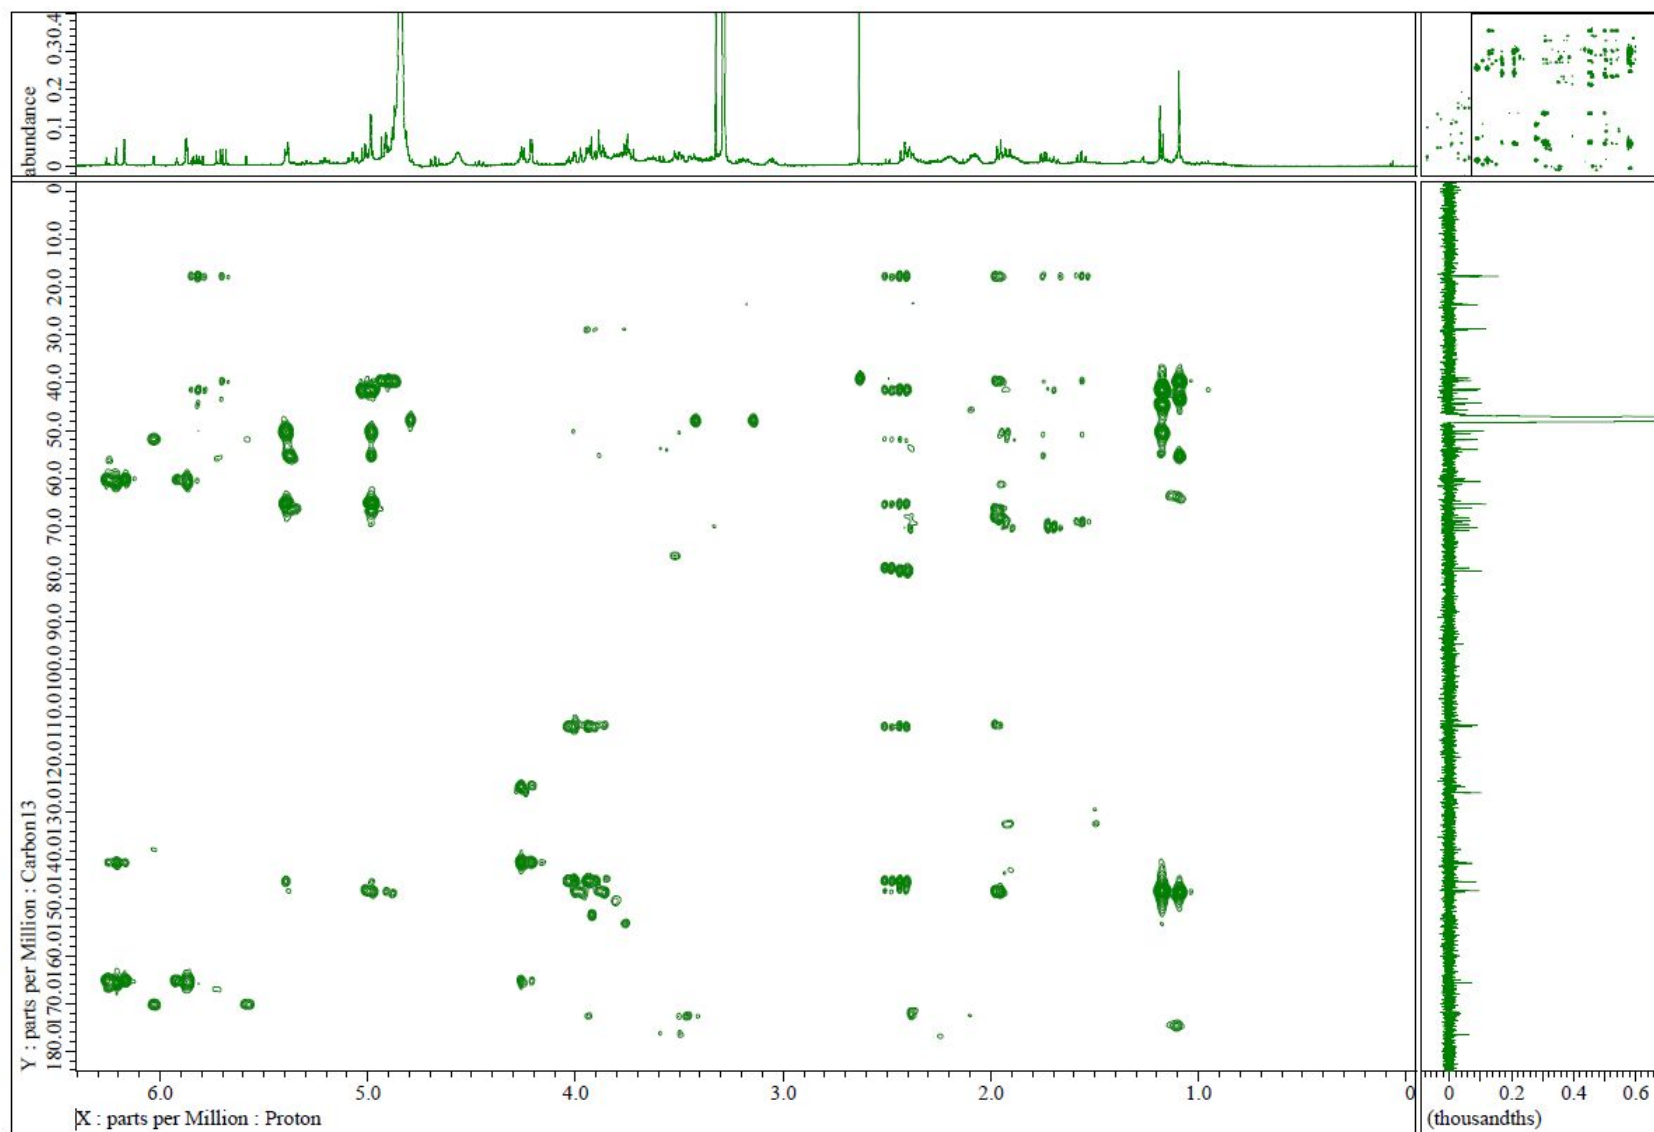

Figure S14. HRESIMS spectrum of the new compound 2

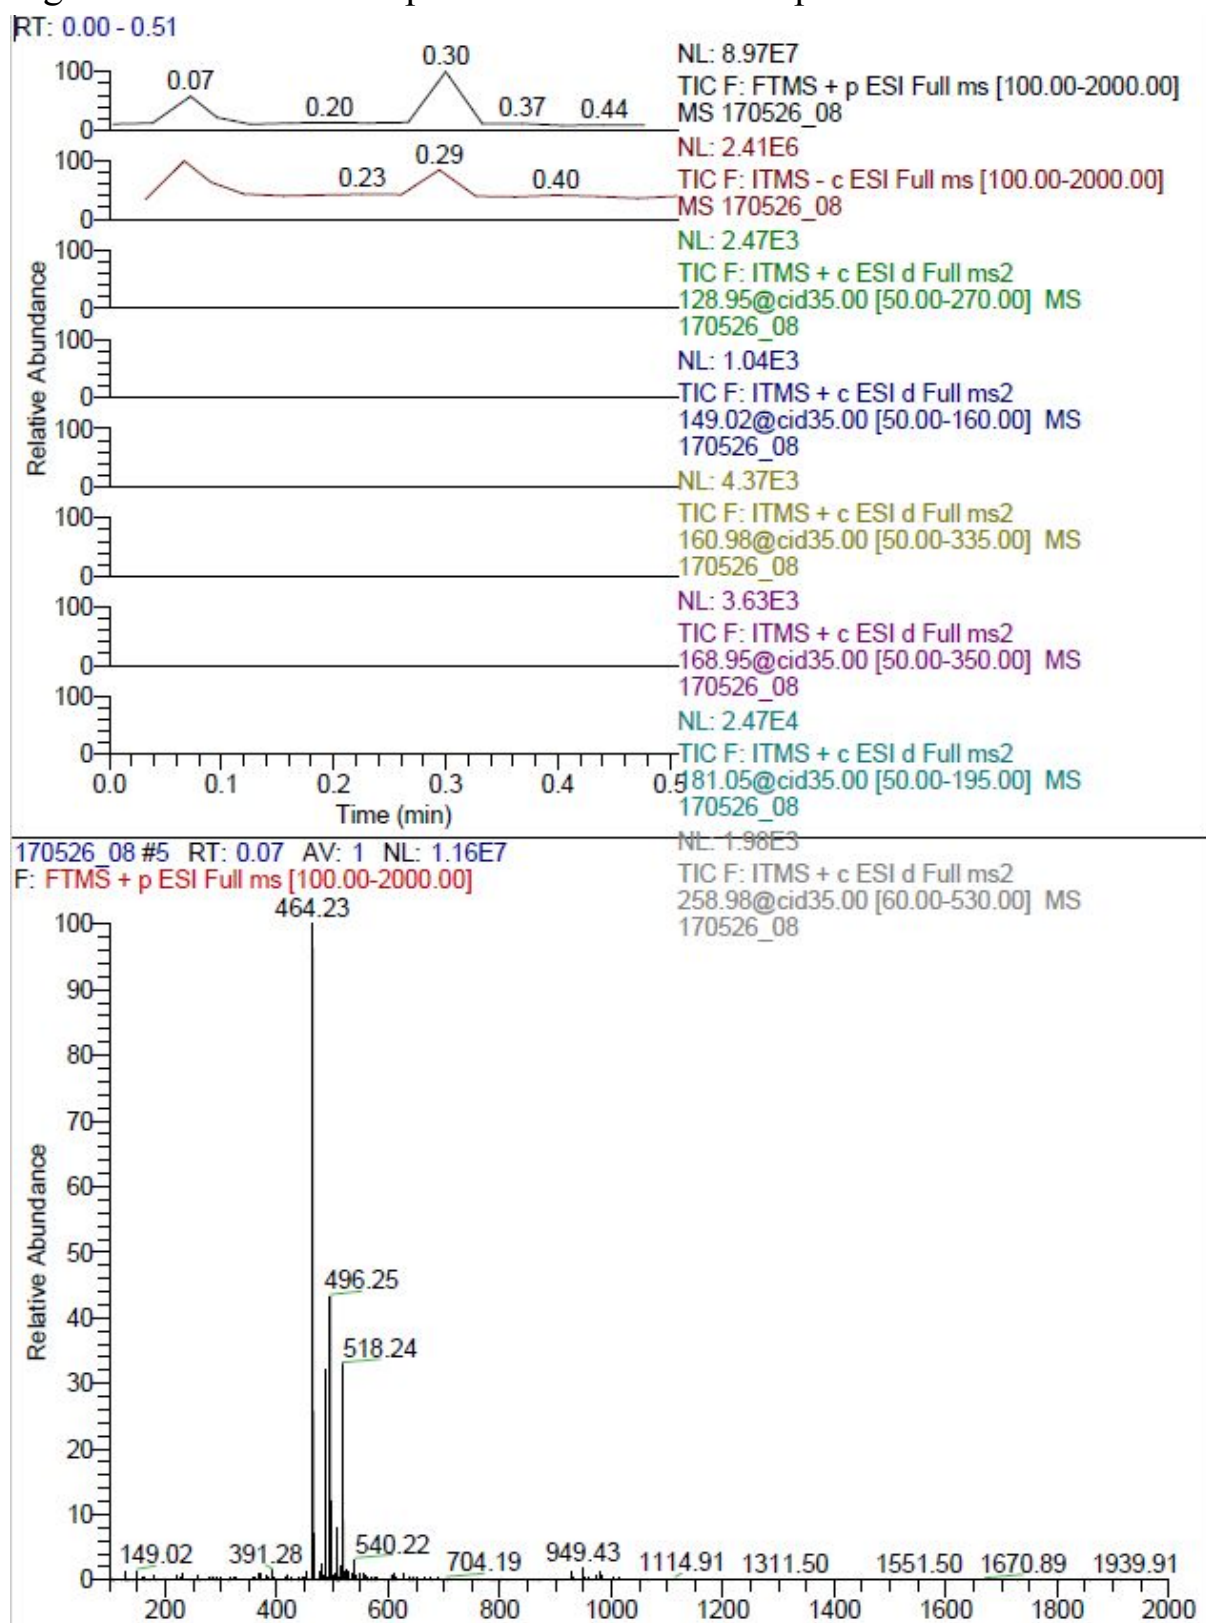

Figure S15. HRESIMS data of the new compound 2

Elemental composition search on mass 464.23

m/z= 459.23-469.23

| m/z      | Theo.<br>Mass | Delta<br>(ppm) | RDB<br>equiv. | Composition                                        |
|----------|---------------|----------------|---------------|----------------------------------------------------|
| 464.2280 | 464.2279      | 0.16           | 8.5           | C <sub>24</sub> H <sub>34</sub> O <sub>8</sub> N   |
|          | 464.2255      | 5.35           | 5.5           | C <sub>22</sub> H <sub>35</sub> O <sub>8</sub> NNa |
|          | 464.2252      | 5.94           | 4.0           | C <sub>21</sub> H <sub>36</sub> O <sub>11</sub>    |
|          | 464.2322      | -9.09          | 14.0          | C <sub>30</sub> H <sub>33</sub> O <sub>3</sub> Na  |
|          | 464.2228      | 11.12          | 1.0           | C <sub>19</sub> H <sub>37</sub> O <sub>11</sub> Na |
|          | 464.2338      | -12.49         | -0.5          | C <sub>17</sub> H <sub>38</sub> O <sub>13</sub> N  |
|          | 464.2196      | 18.00          | 14.5          | C <sub>29</sub> H <sub>31</sub> O <sub>3</sub> NNa |
|          | 464.2193      | 18.59          | 13.0          | C <sub>28</sub> H <sub>32</sub> O <sub>6</sub>     |
|          | 464.2381      | -21.74         | 5.0           | C <sub>23</sub> H <sub>37</sub> O <sub>8</sub> Na  |
|          | 464.2169      | 23.77          | 10.0          | C <sub>26</sub> H <sub>33</sub> O <sub>6</sub> Na  |

Figure S16. ESIMS (in-source fragmentation) spectrum of compound 2

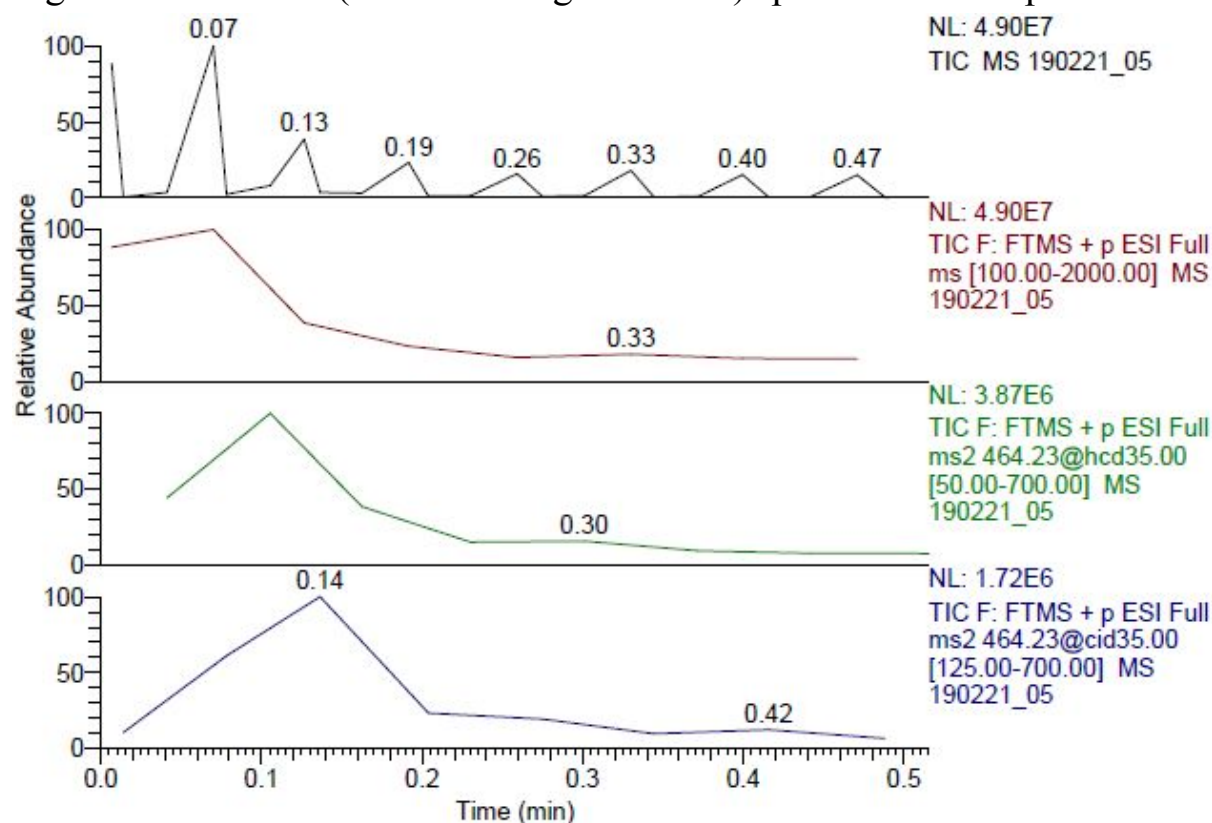

90221\_05 #6 RT: 0.11 AV: 1 NL: 1.55E6  
FTMS + p ESI Full ms2 464.23@hcd35.00 [50.00-700.00]

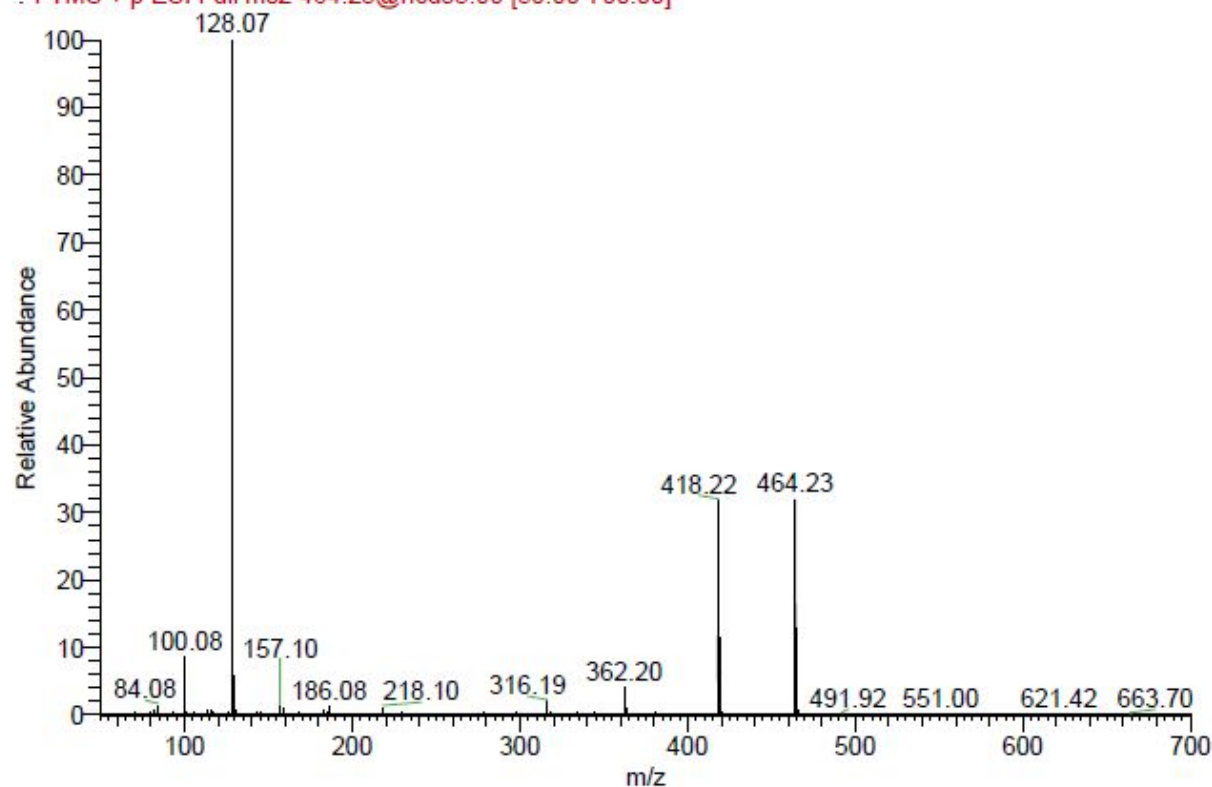

Figure S17.  $^1\text{H}$  NMR (600 MHz,  $\text{CD}_3\text{OD}$ ) spectrum of the new compound 3

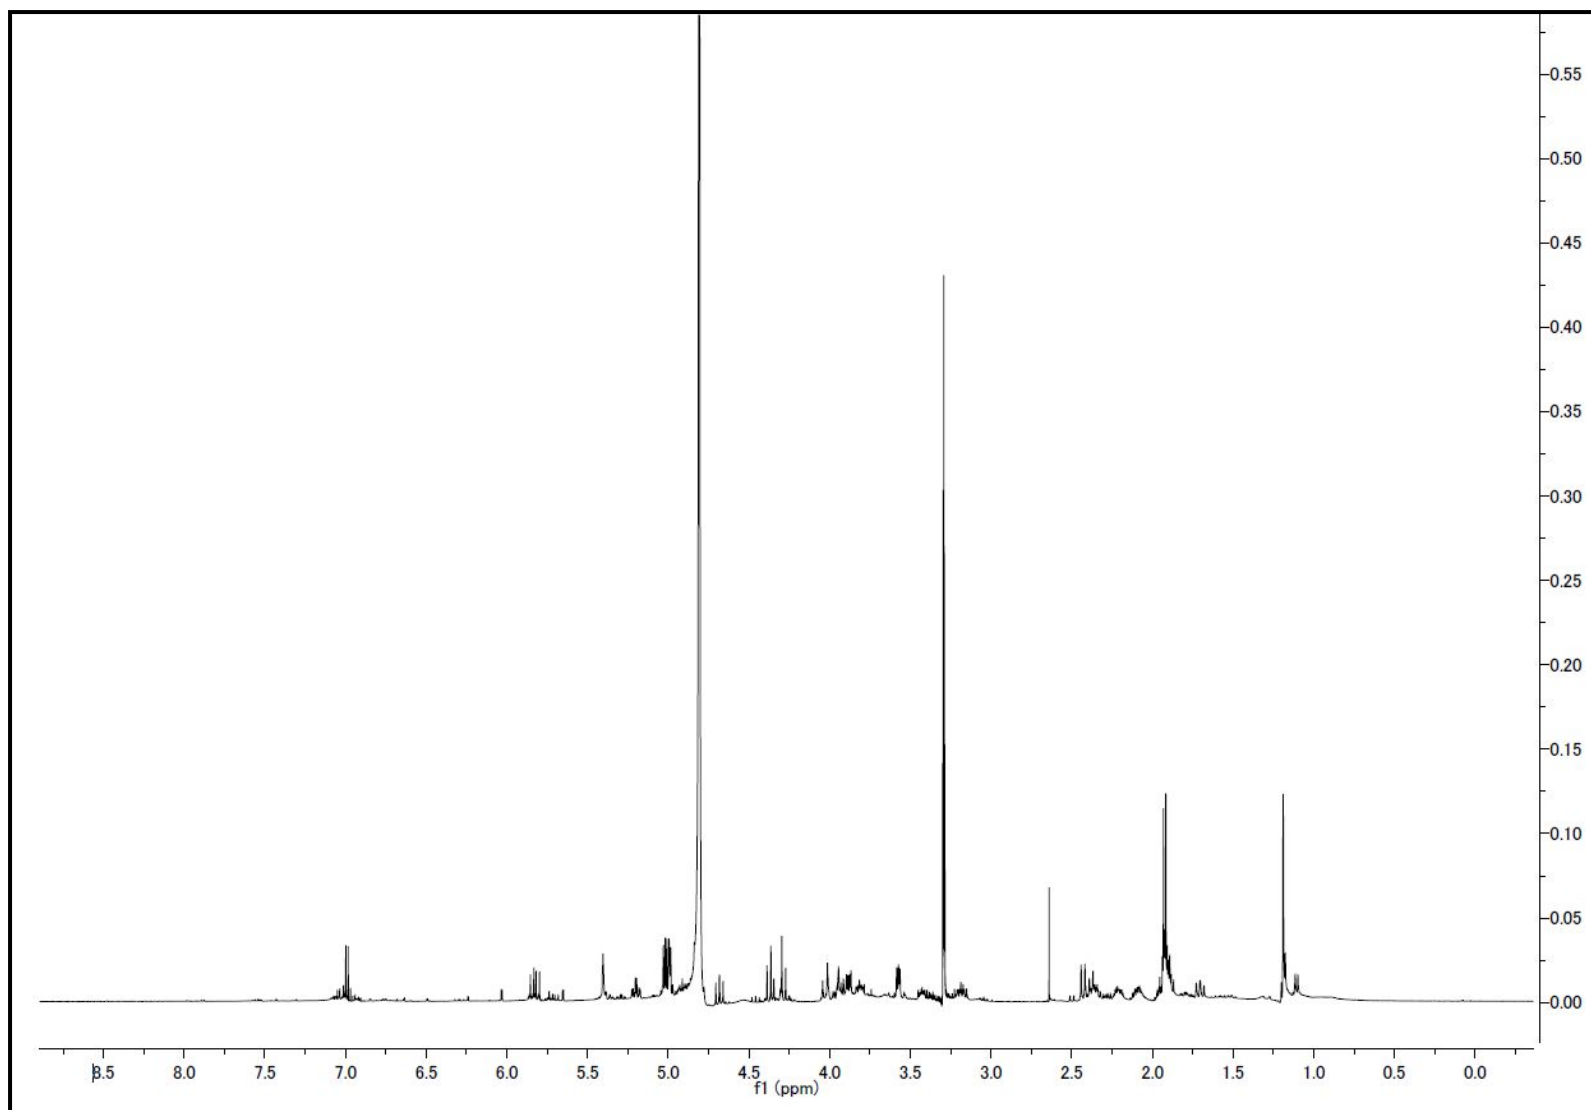

Figure S18.  $^{13}\text{C}$  NMR (150 MHz,  $\text{CD}_3\text{OD}$ ) spectrum of the new compound 3

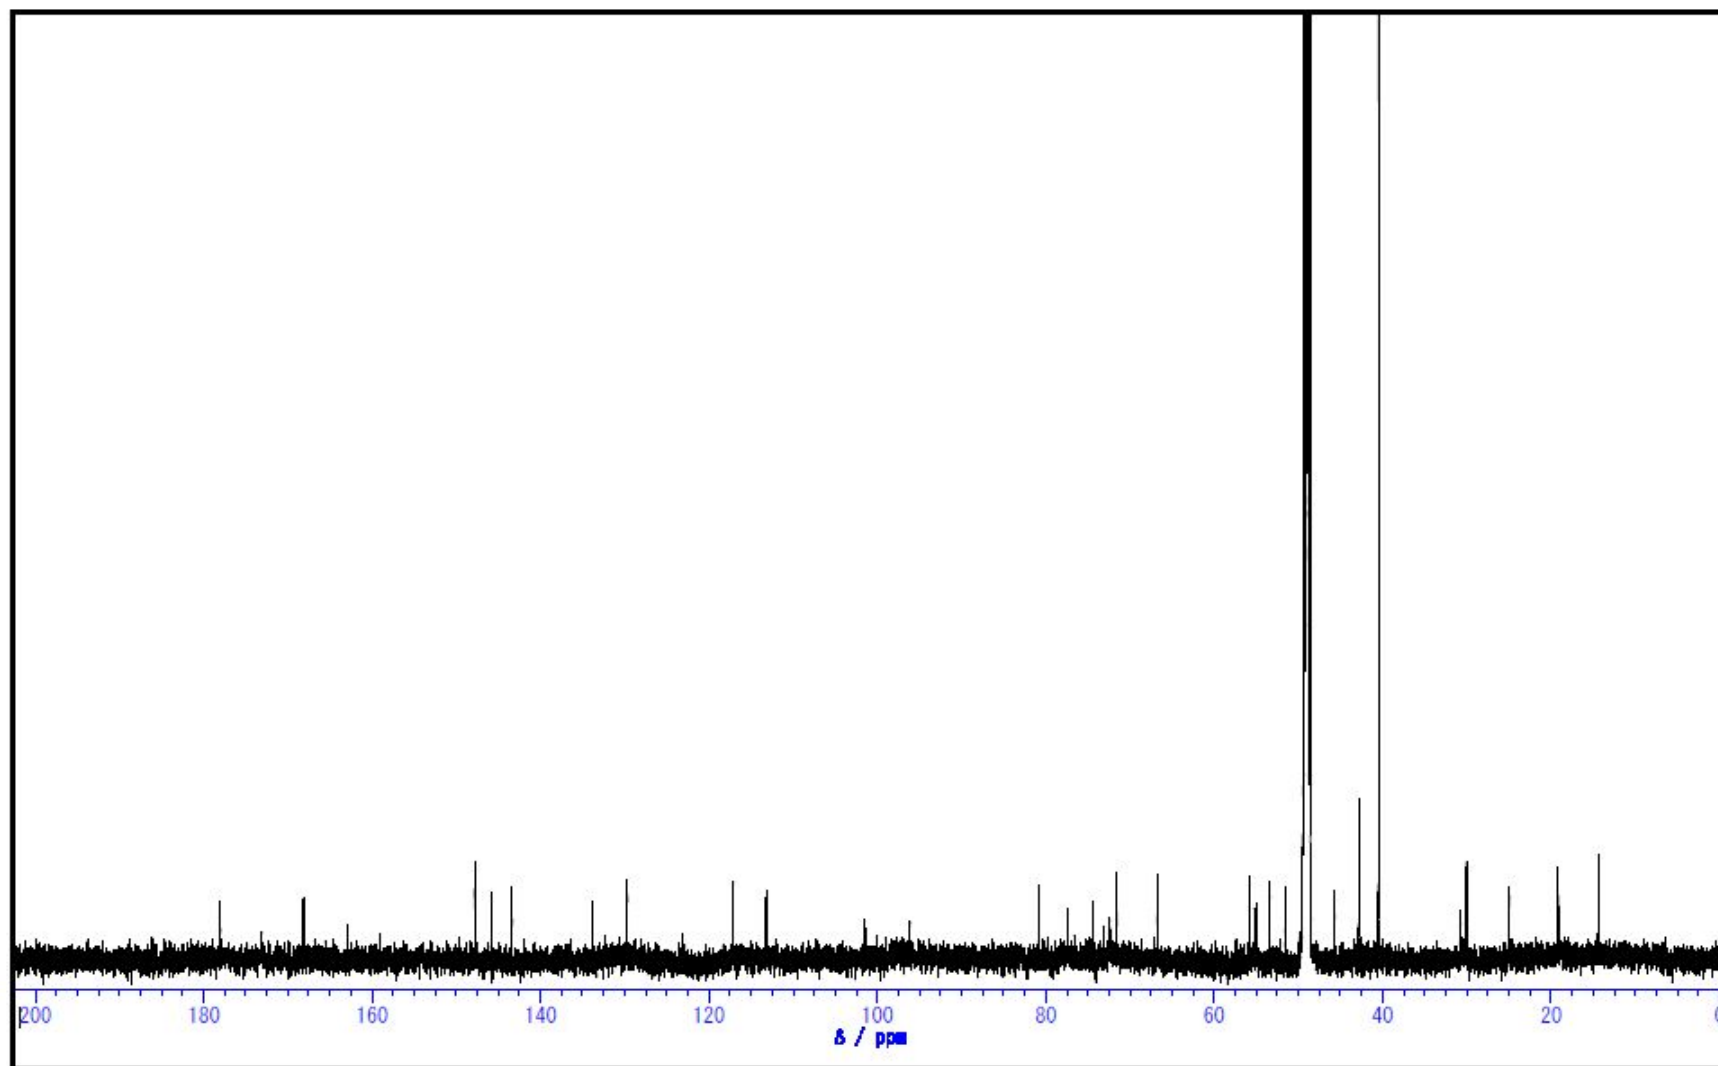

Figure S19.  $^1\text{H}$ - $^1\text{H}$  COSY NMR (600 MHz,  $\text{CD}_3\text{OD}$ ) spectrum of the new compound 3

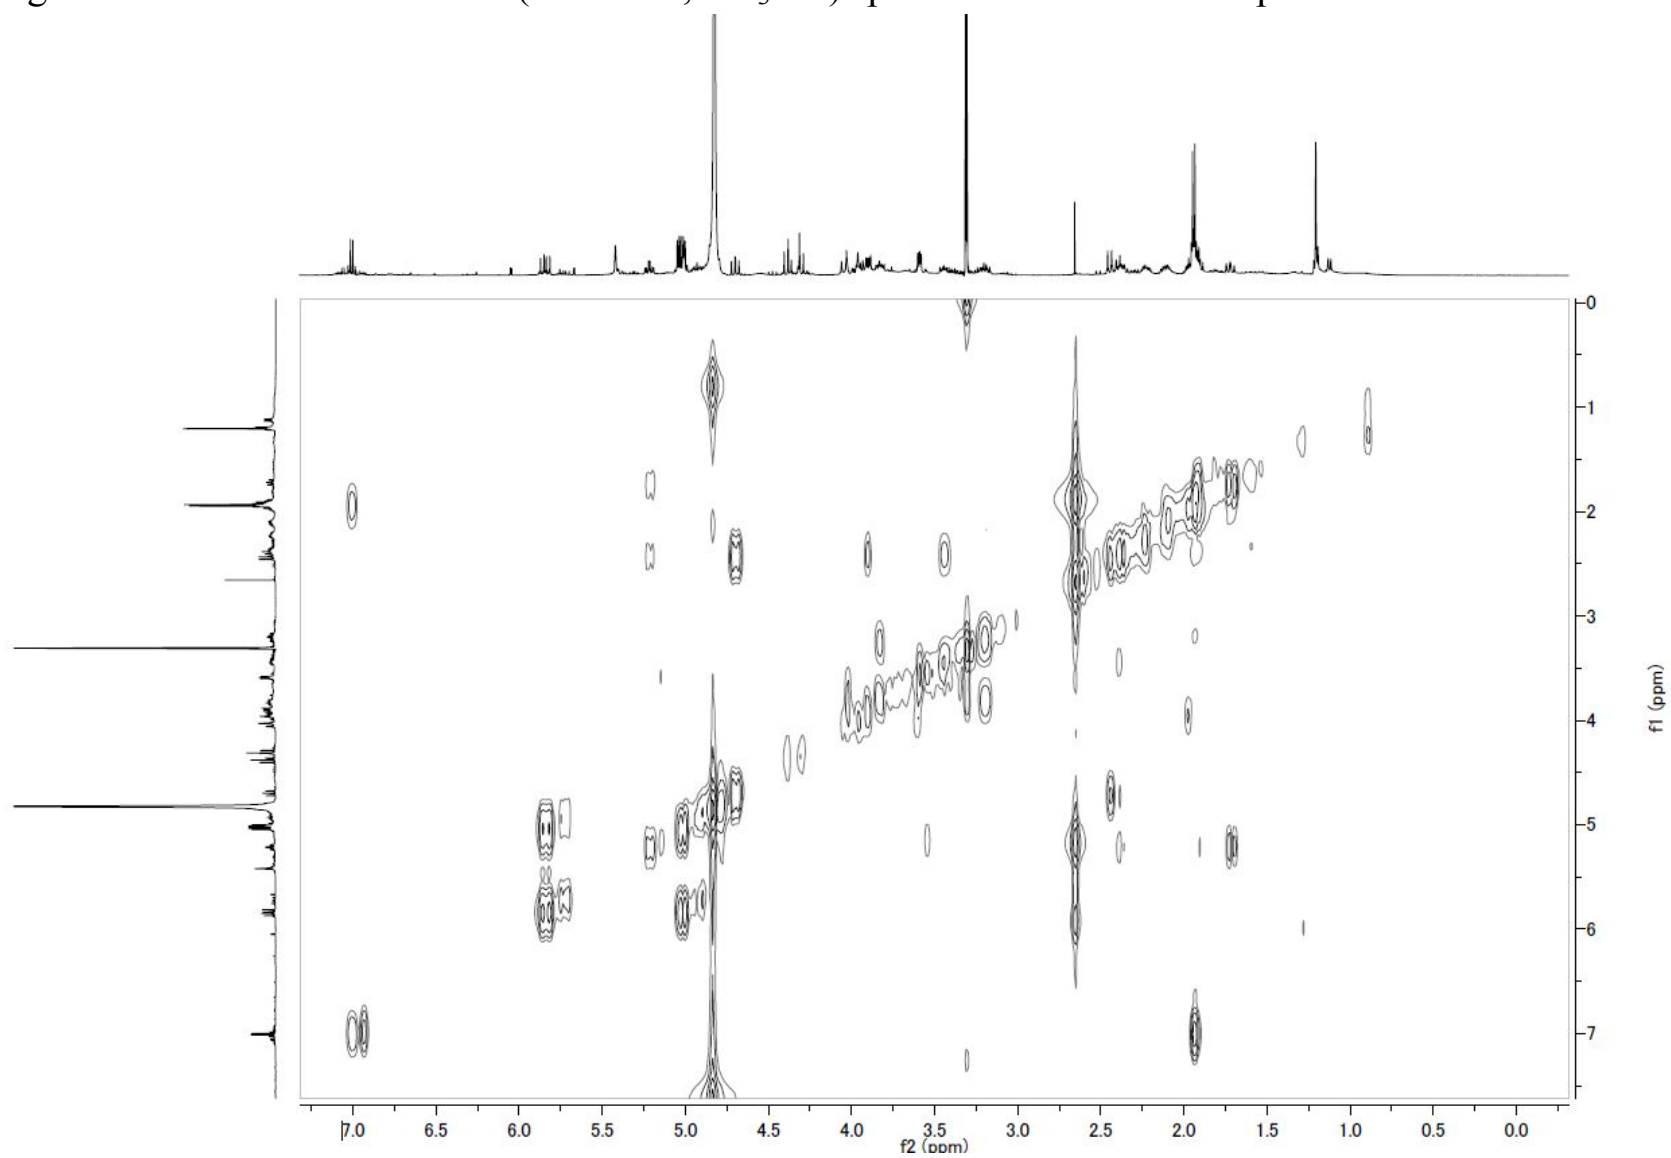

Figure S20. HMQC NMR (600 MHz, CD<sub>3</sub>OD) spectrum of the new compound 3

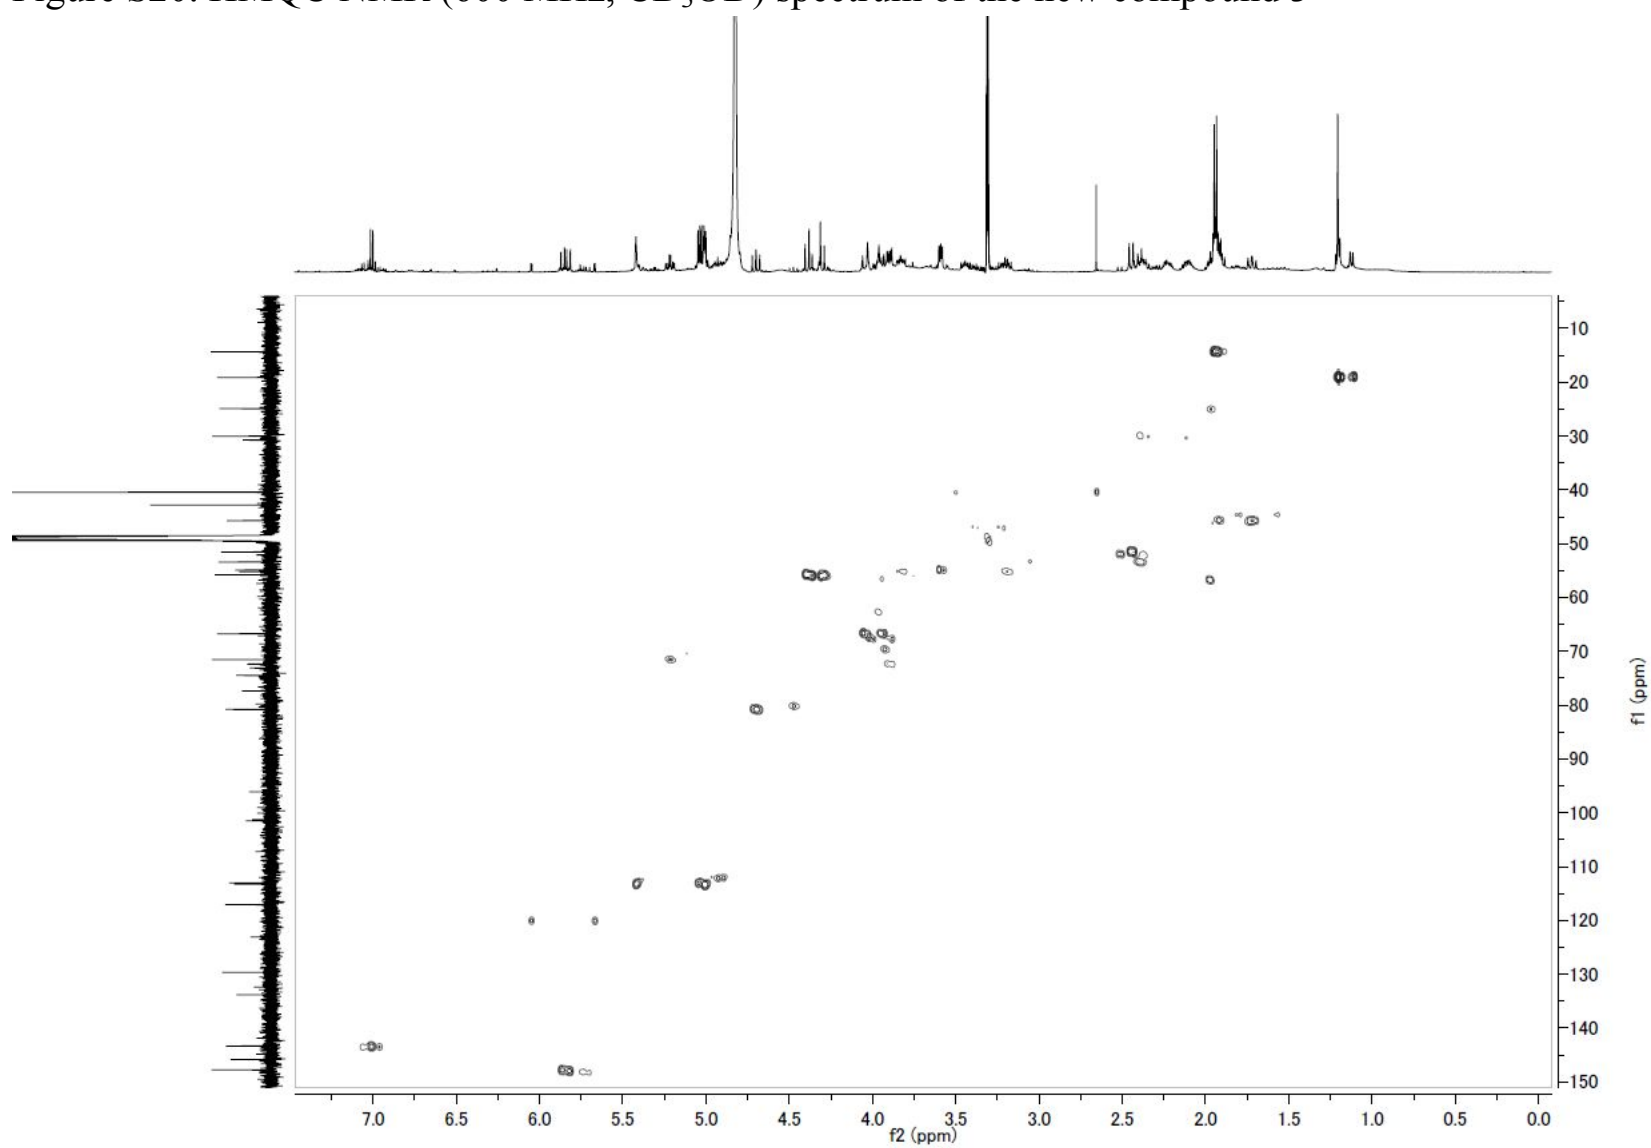

Figure S21. HMBC NMR (600 MHz, CD<sub>3</sub>OD) spectrum of the new compound 3

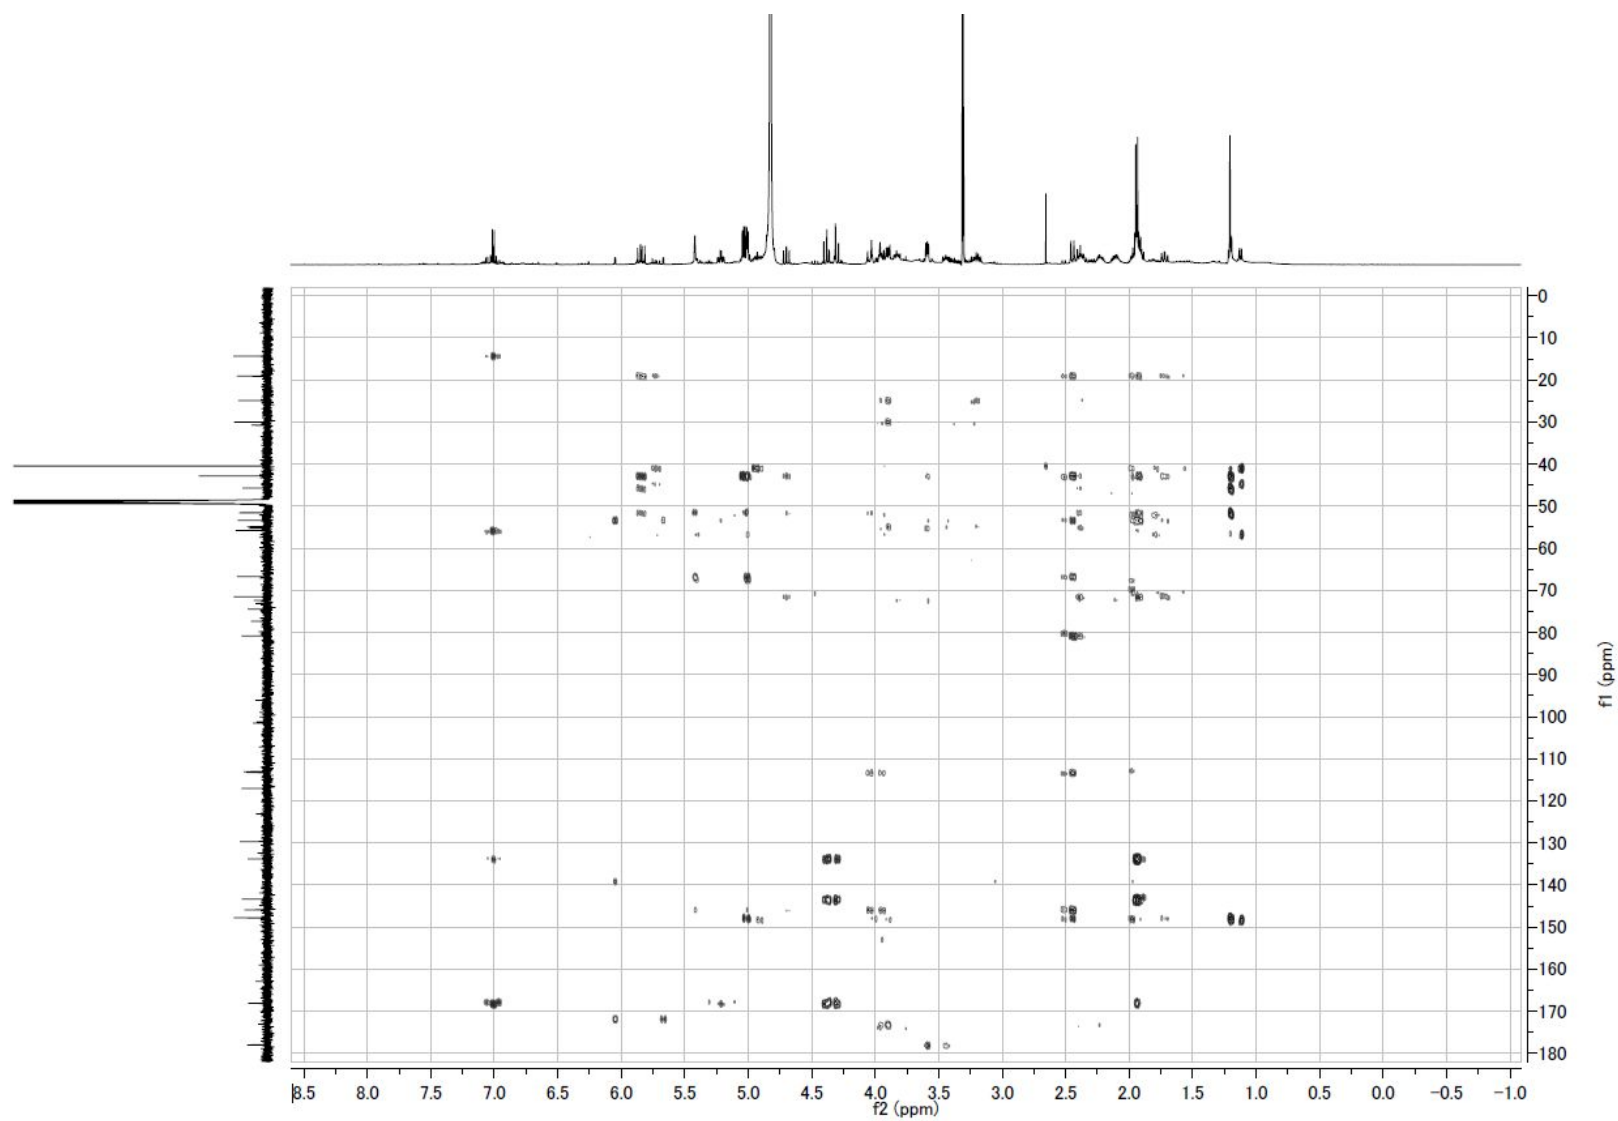

Figure S22. HRESIMS spectrum of the new compound 3

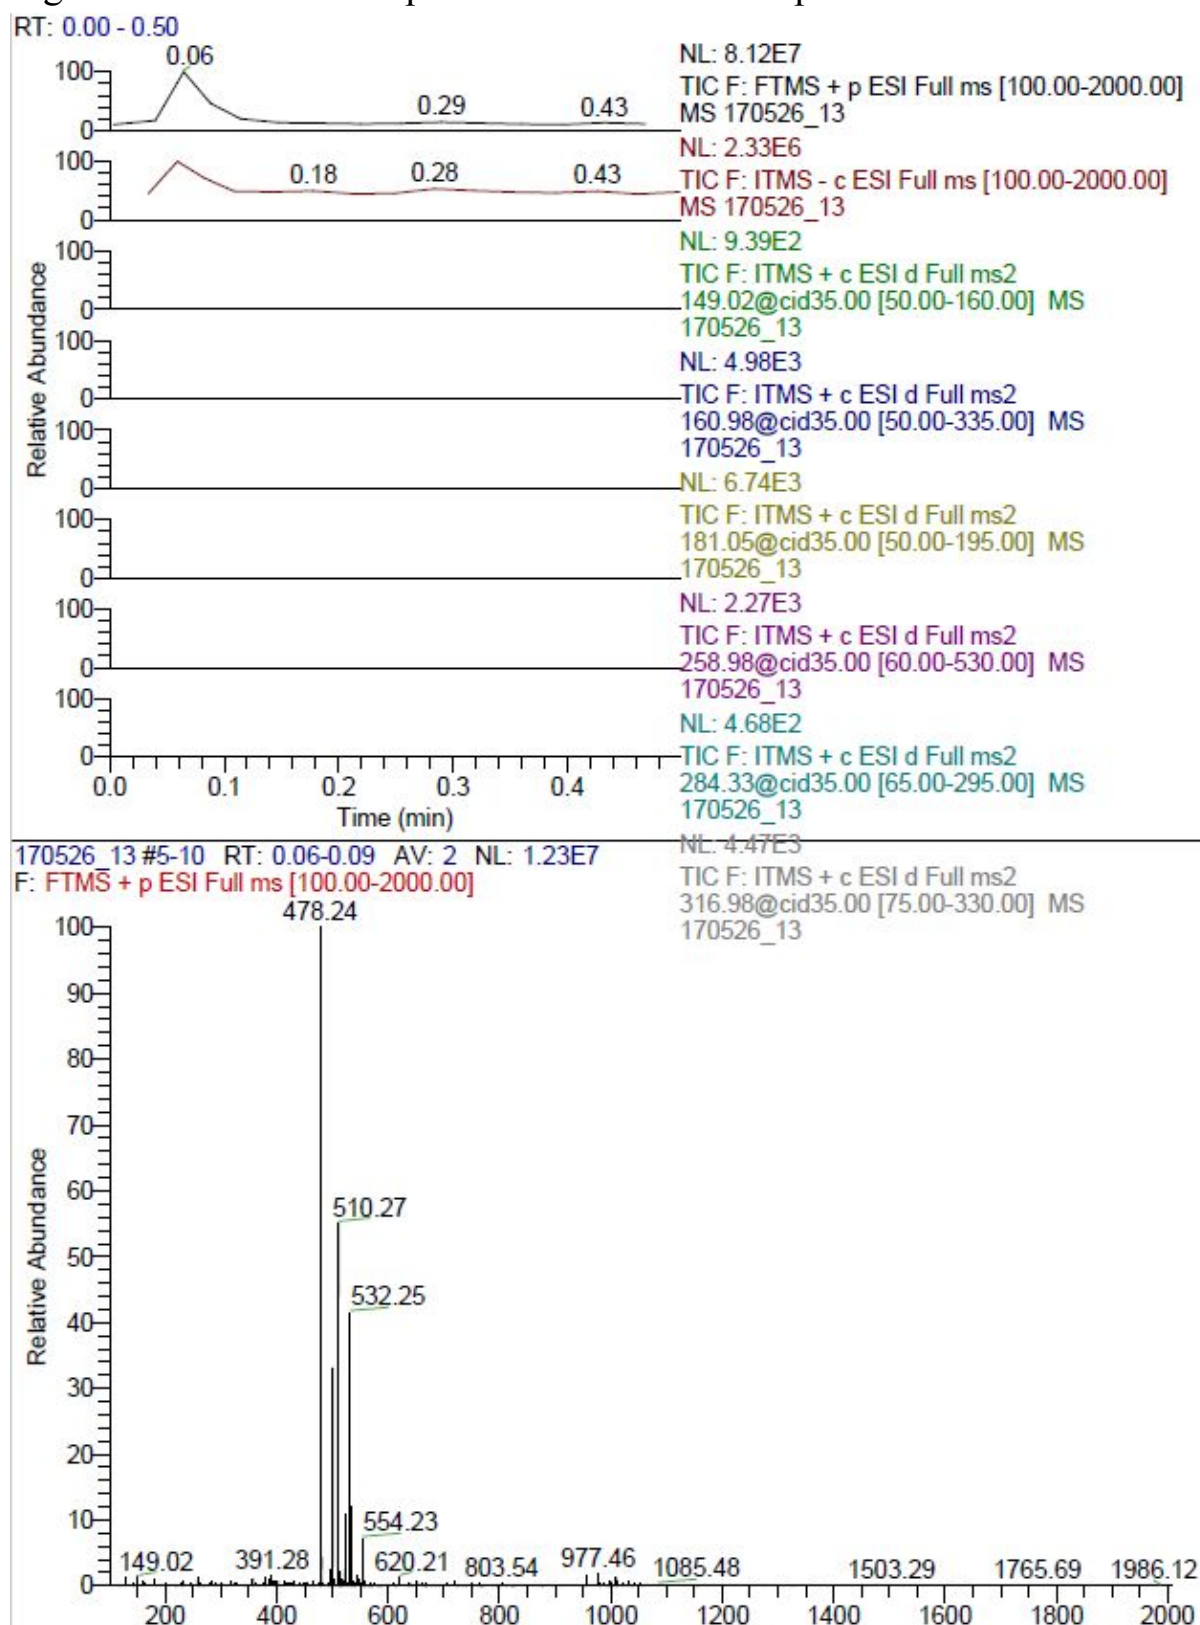

Figure S23. HRESIMS data of the new compound 3

Elemental composition search on mass 478.24

m/z= 473.24-483.24

| m/z      | Theo.<br>Mass | Delta<br>(ppm) | RDB<br>equiv. | Composition                                        |
|----------|---------------|----------------|---------------|----------------------------------------------------|
| 478.2435 | 478.2435      | -0.07          | 8.5           | C <sub>25</sub> H <sub>36</sub> O <sub>8</sub> N   |
|          | 478.2411      | 4.96           | 5.5           | C <sub>23</sub> H <sub>37</sub> O <sub>8</sub> NNa |
|          | 478.2409      | 5.53           | 4.0           | C <sub>22</sub> H <sub>38</sub> O <sub>11</sub>    |
|          | 478.2385      | 10.56          | 1.0           | C <sub>20</sub> H <sub>39</sub> O <sub>11</sub> Na |
|          | 478.2494      | -12.35         | -0.5          | C <sub>18</sub> H <sub>40</sub> O <sub>13</sub> N  |
|          | 478.2353      | 17.24          | 14.5          | C <sub>30</sub> H <sub>33</sub> O <sub>3</sub> NNa |
|          | 478.2350      | 17.81          | 13.0          | C <sub>29</sub> H <sub>34</sub> O <sub>6</sub>     |
|          | 478.2537      | -21.34         | 5.0           | C <sub>24</sub> H <sub>39</sub> O <sub>8</sub> Na  |
|          | 478.2326      | 22.84          | 10.0          | C <sub>27</sub> H <sub>35</sub> O <sub>6</sub> Na  |
|          | 478.2561      | -26.37         | 8.0           | C <sub>26</sub> H <sub>38</sub> O <sub>8</sub>     |

Figure S24. ESIMS (in-source fragmentation) spectrum of compound 3

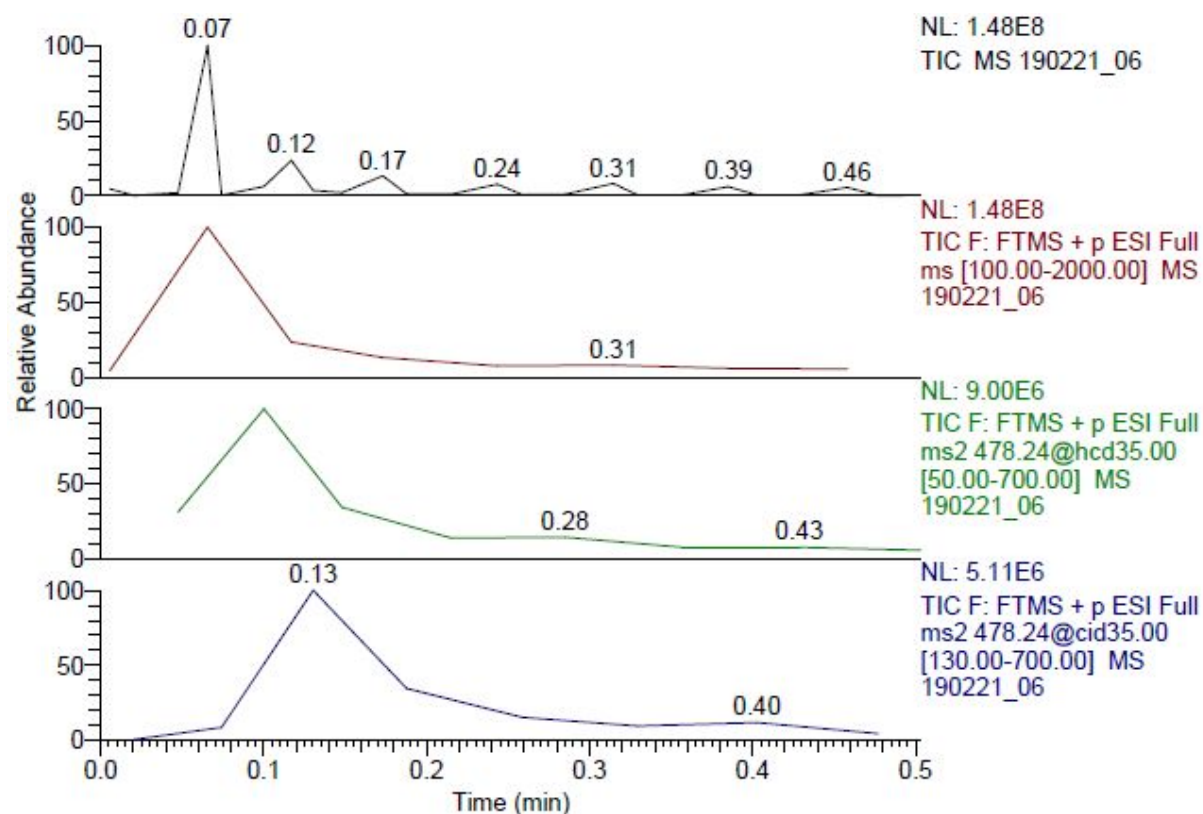

190221\_06 #6 RT: 0.10 AV: 1 NL: 3.58E6  
F: FTMS + p ESI Full ms2 478.24@hcd35.00 [50.00-700.00]

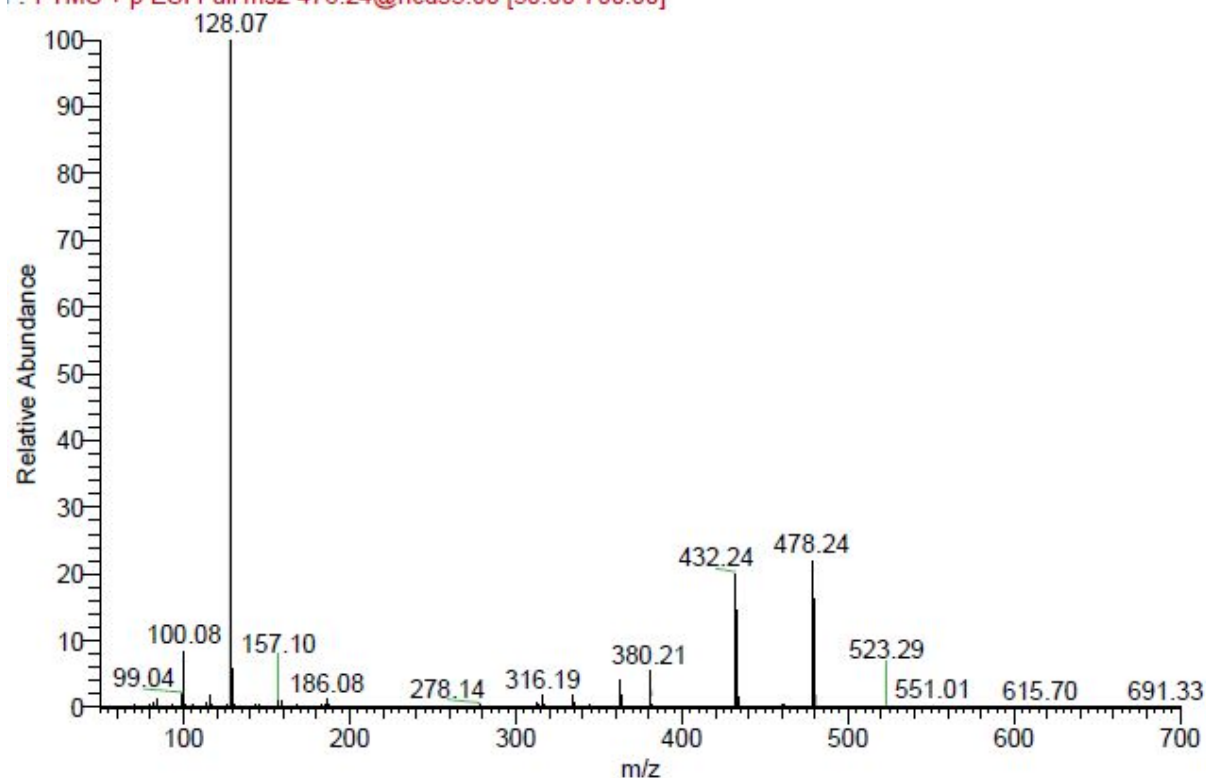

Figure S25.  $^1\text{H}$  NMR (600 MHz,  $\text{CD}_3\text{OD}$ ) spectrum of the new compound 4

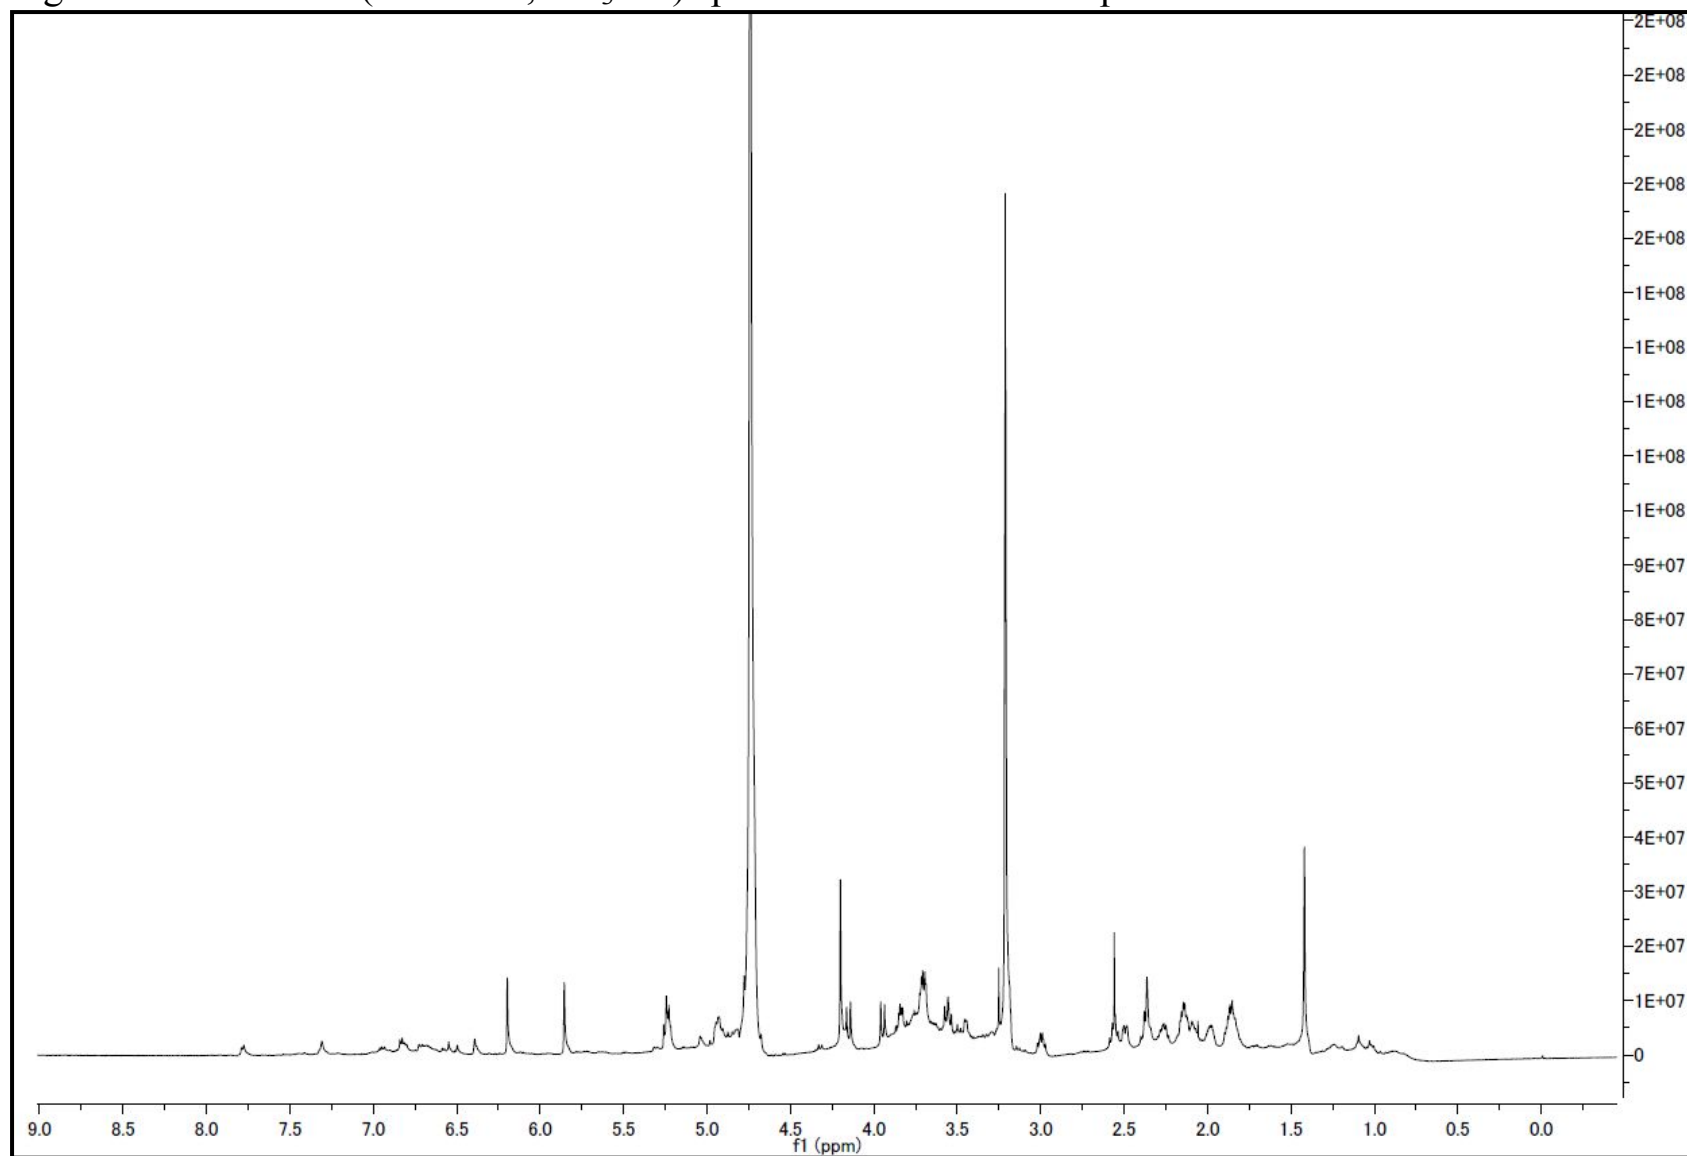

Figure S26.  $^{13}\text{C}$  NMR (150 MHz,  $\text{CD}_3\text{OD}$ ) spectrum of the new compound 4

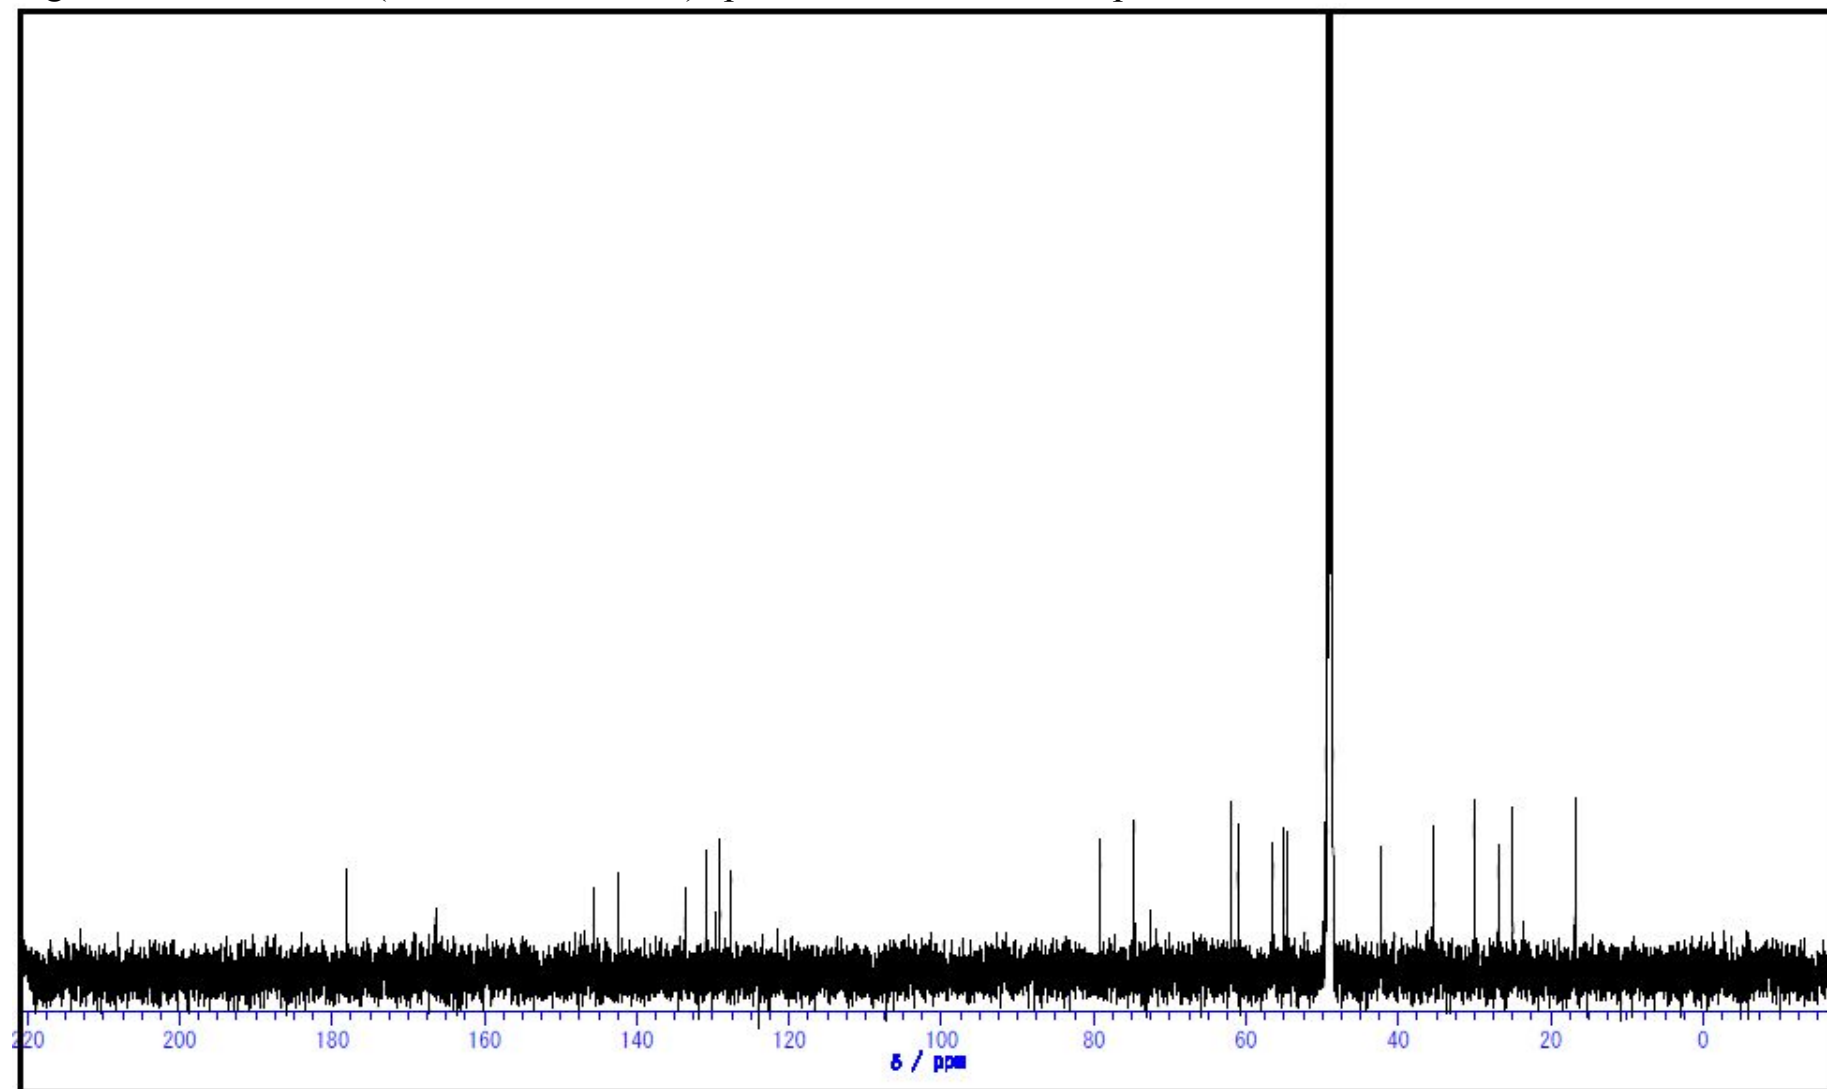

Figure S27.  $^1\text{H}$ - $^1\text{H}$  COSY NMR (600 MHz,  $\text{CD}_3\text{OD}$ ) spectrum of the new compound 4

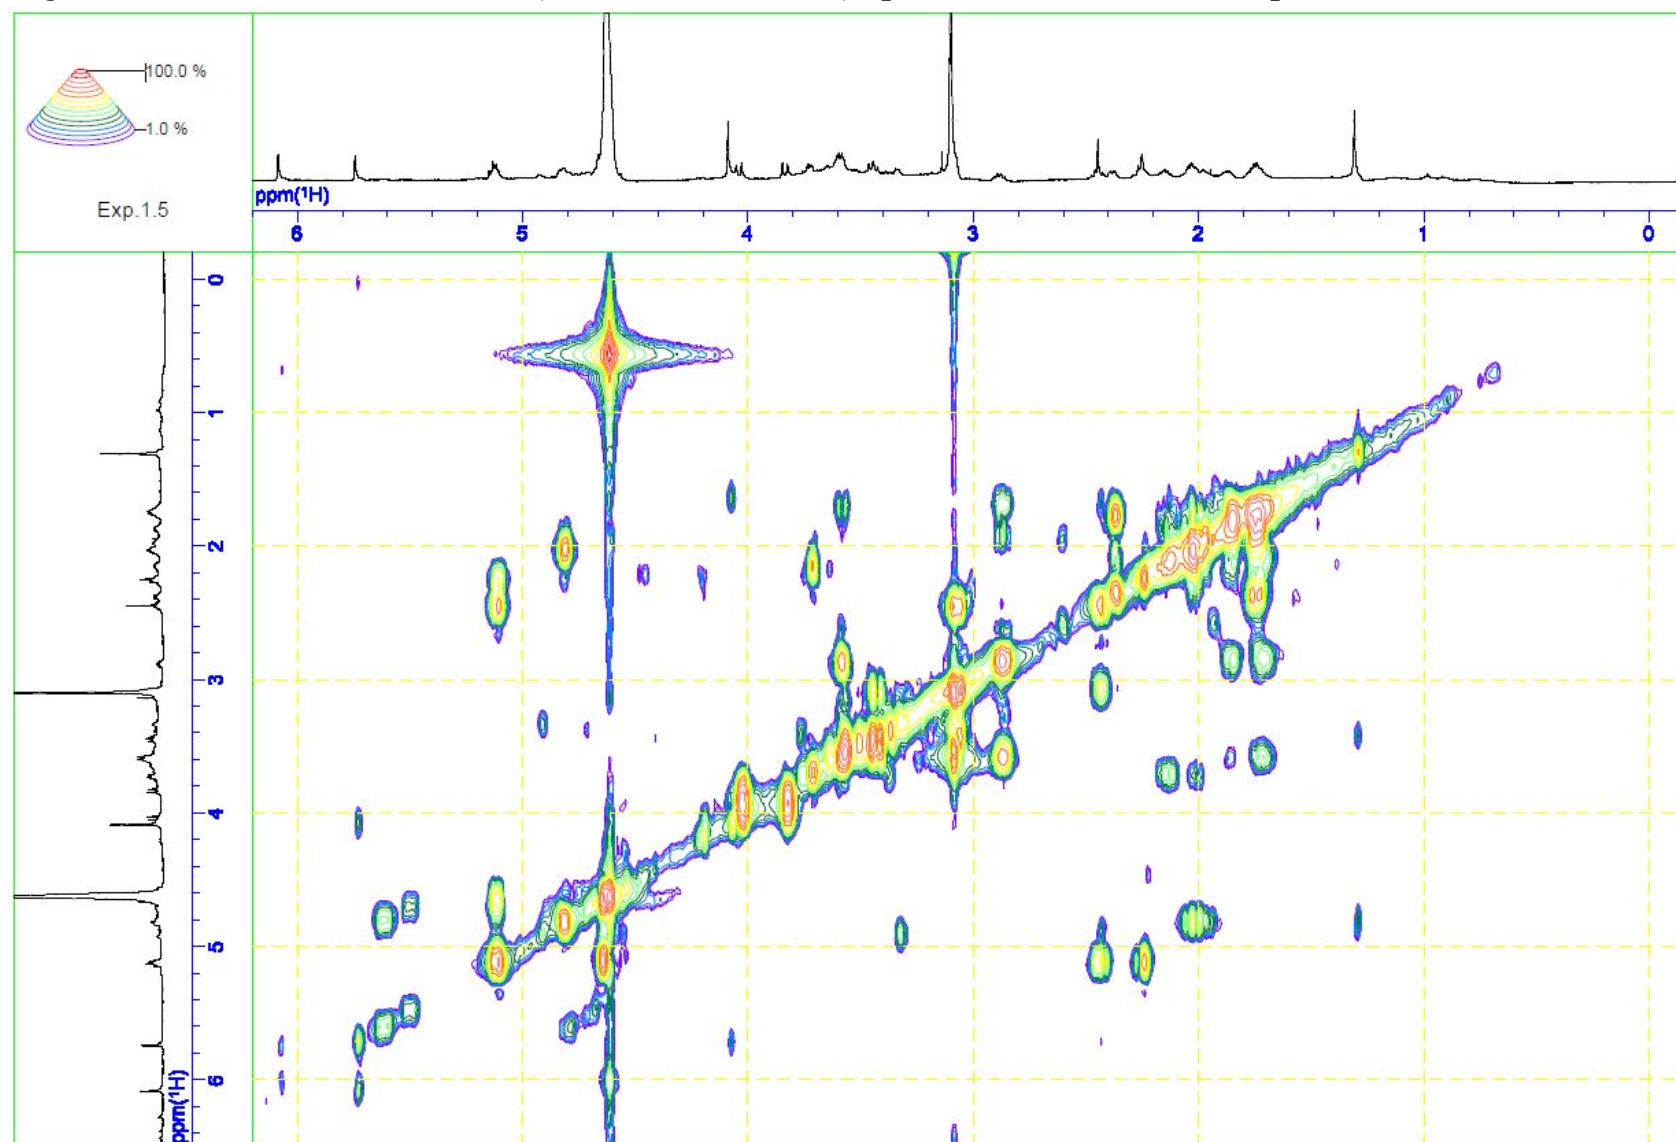

Figure S28. HMQC NMR (600 MHz, CD<sub>3</sub>OD) spectrum of the new compound 4

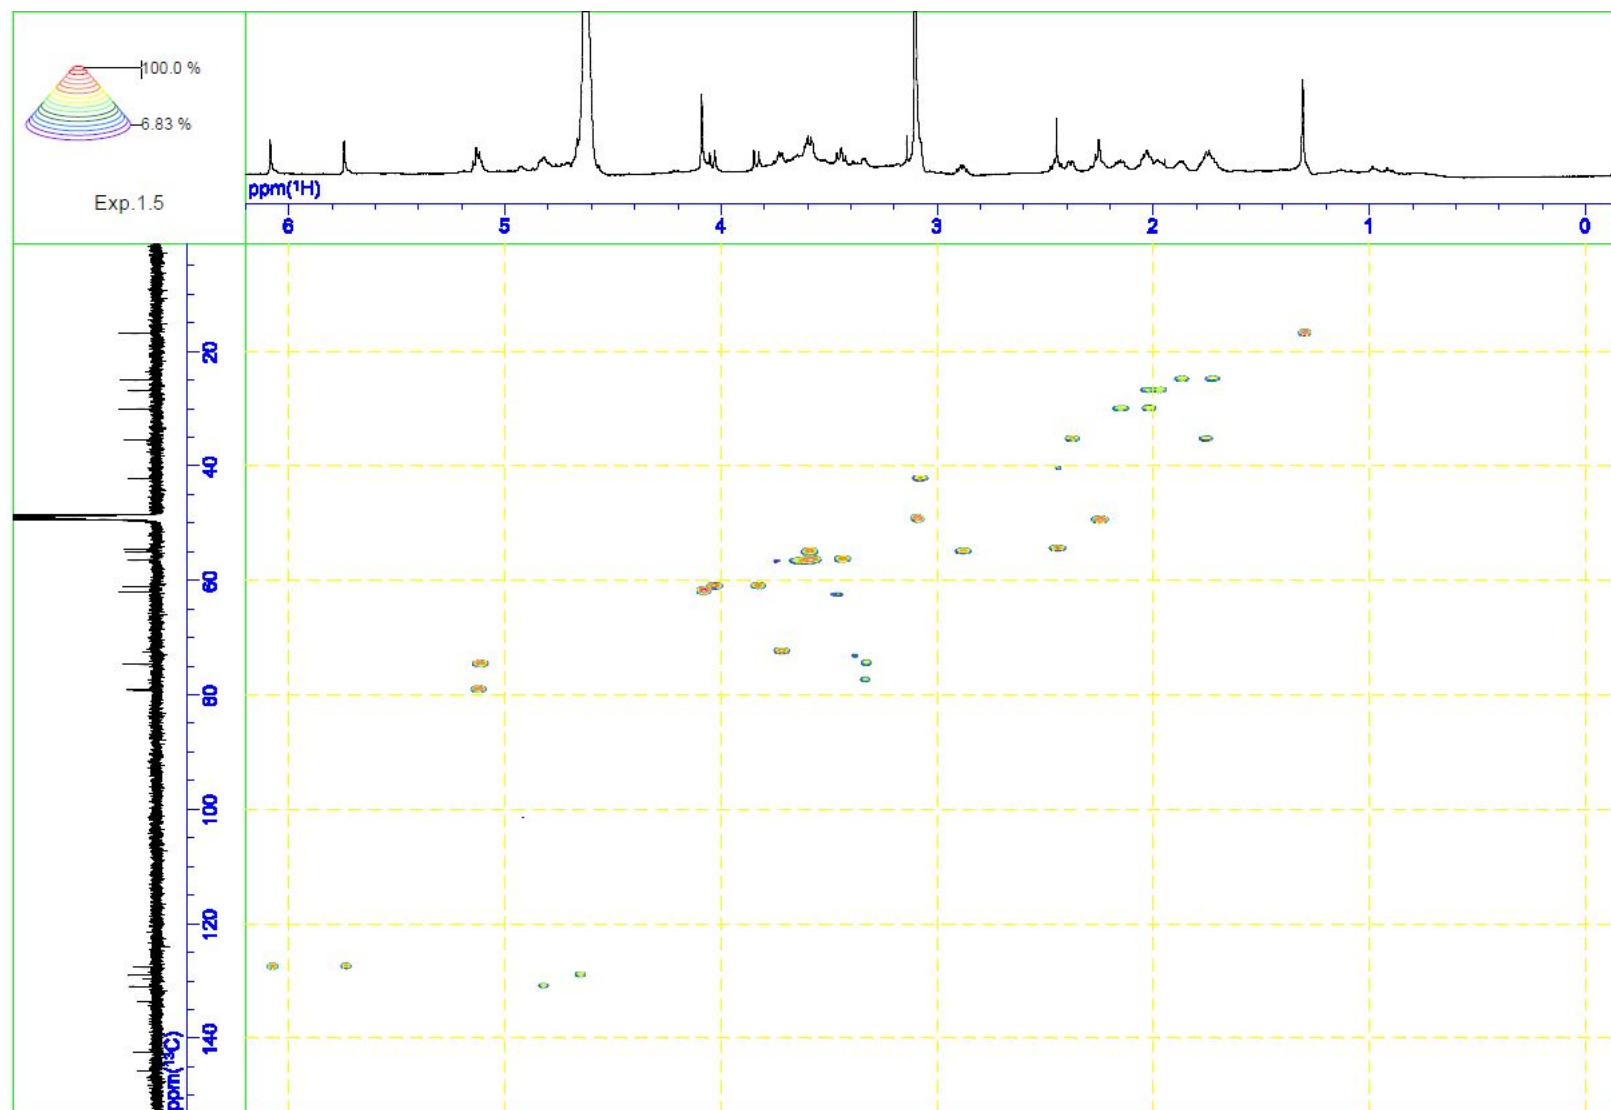

Figure S29. HMBC NMR (600 MHz, CD<sub>3</sub>OD) spectrum of the new compound 4

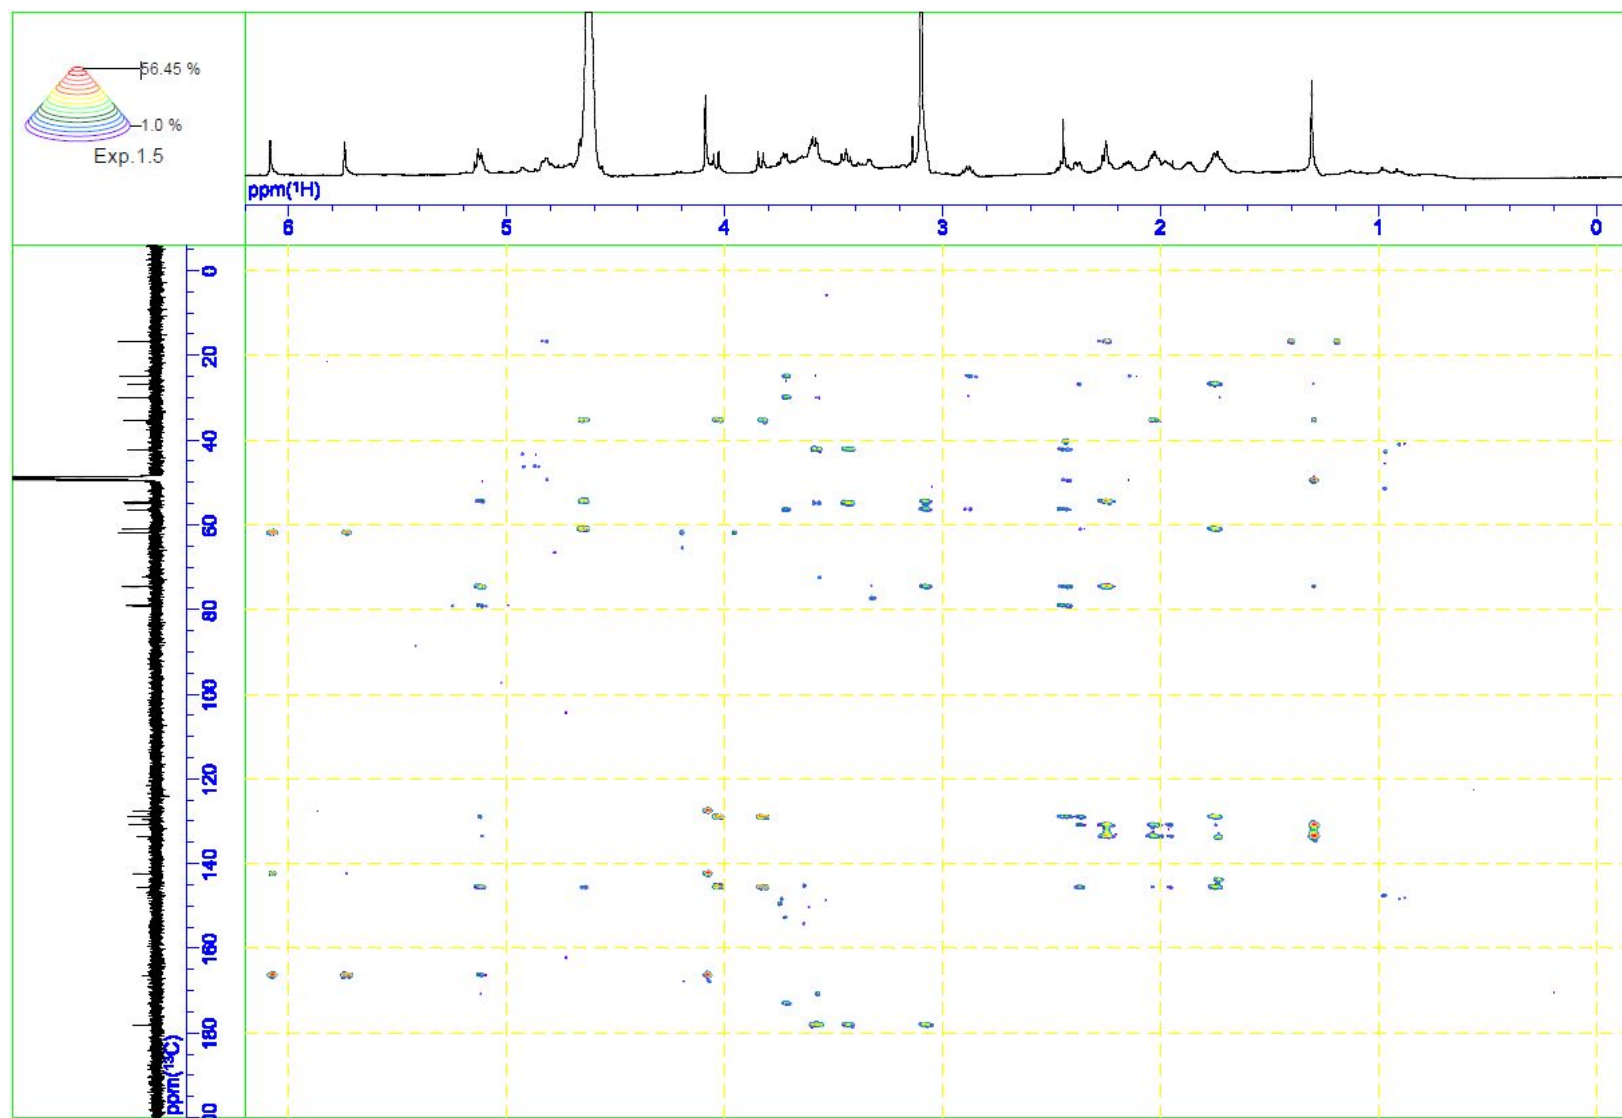

Figure S30. HRESIMS spectrum of the new compound 4

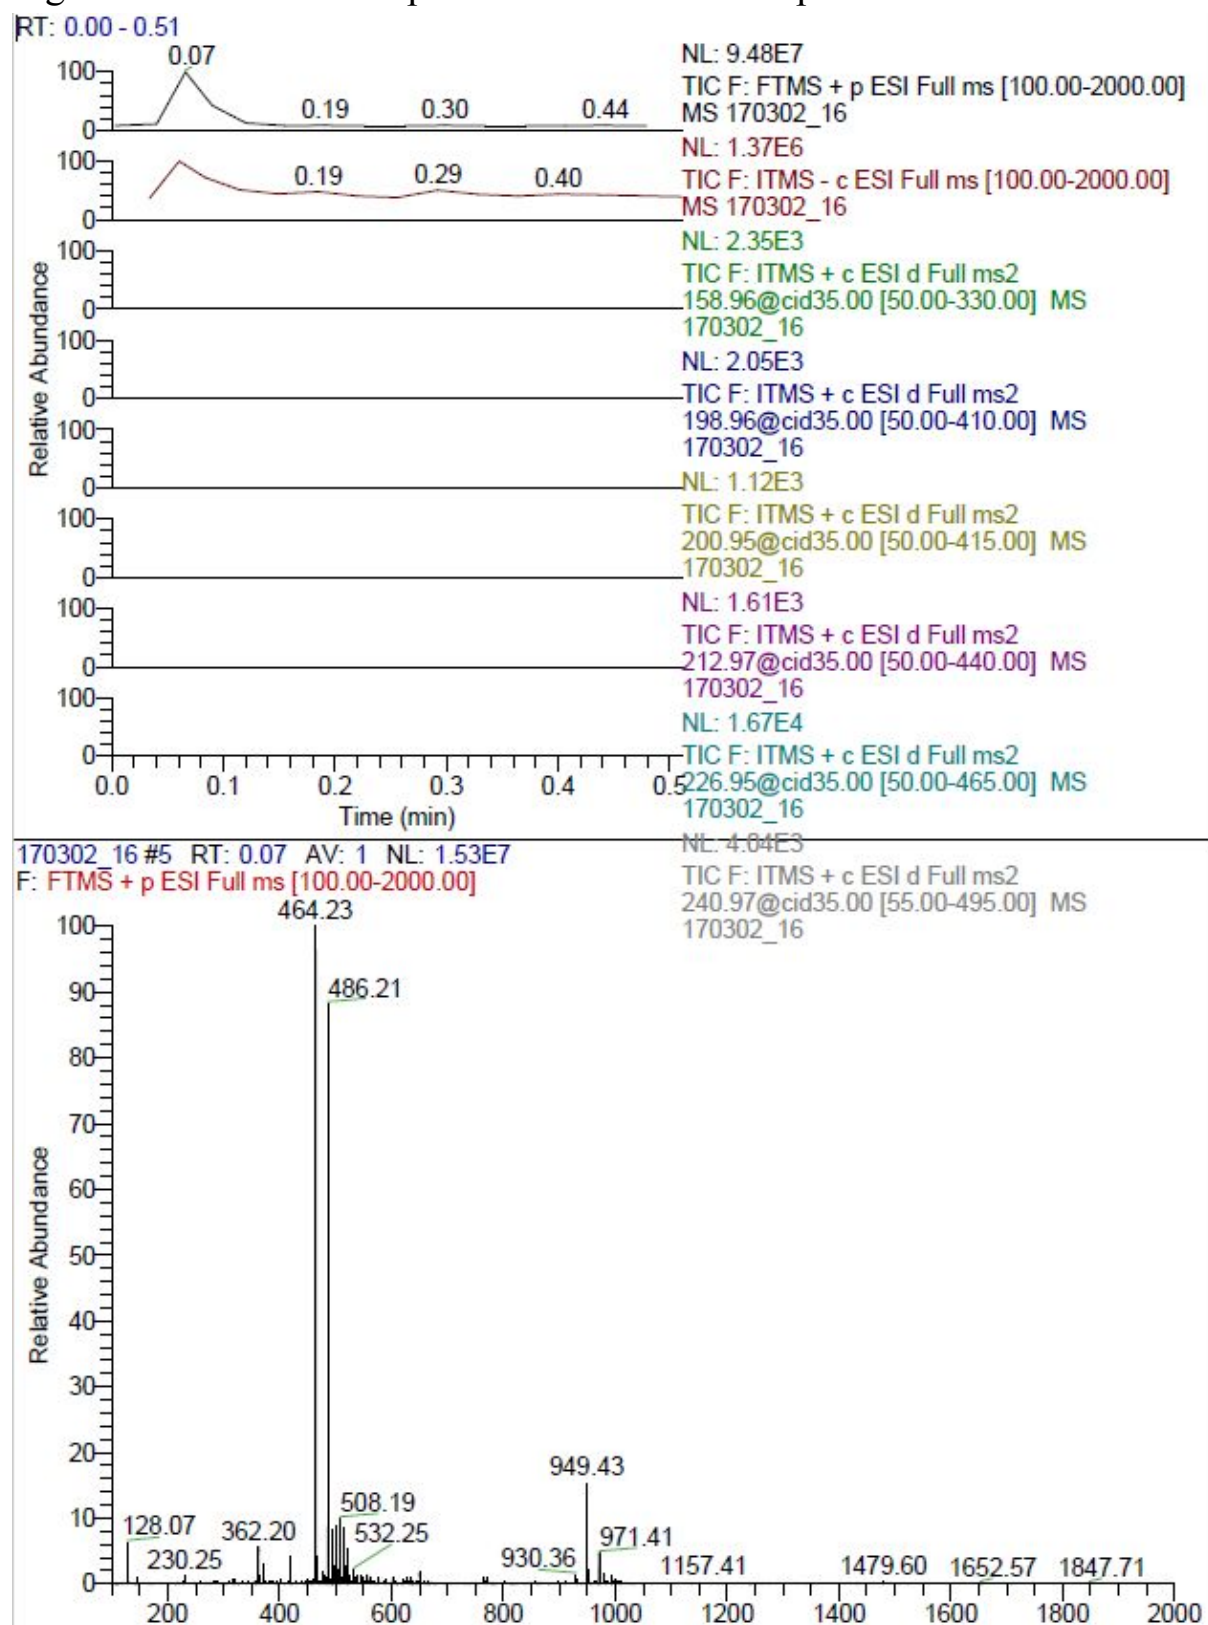

Figure S31. HRESIMS data of the new compound 4

| Elemental composition search on mass 464.23 |            |             |            |                                                    |
|---------------------------------------------|------------|-------------|------------|----------------------------------------------------|
| m/z= 459.23-469.23                          |            |             |            |                                                    |
| m/z                                         | Theo. Mass | Delta (ppm) | RDB equiv. | Composition                                        |
| 464.2279                                    | 464.2279   | -0.05       | 8.5        | C <sub>24</sub> H <sub>34</sub> O <sub>8</sub> N   |
|                                             | 464.2255   | 5.13        | 5.5        | C <sub>22</sub> H <sub>35</sub> O <sub>8</sub> NNa |
|                                             | 464.2252   | 5.72        | 4.0        | C <sub>21</sub> H <sub>36</sub> O <sub>11</sub>    |
|                                             | 464.2322   | -9.31       | 14.0       | C <sub>30</sub> H <sub>33</sub> O <sub>3</sub> Na  |
|                                             | 464.2228   | 10.90       | 1.0        | C <sub>19</sub> H <sub>37</sub> O <sub>11</sub> Na |
|                                             | 464.2338   | -12.70      | -0.5       | C <sub>17</sub> H <sub>38</sub> O <sub>13</sub> N  |
|                                             | 464.2196   | 17.78       | 14.5       | C <sub>29</sub> H <sub>31</sub> O <sub>3</sub> NNa |
|                                             | 464.2193   | 18.37       | 13.0       | C <sub>28</sub> H <sub>32</sub> O <sub>6</sub>     |
|                                             | 464.2381   | -21.96      | 5.0        | C <sub>23</sub> H <sub>37</sub> O <sub>8</sub> Na  |
|                                             | 464.2169   | 23.56       | 10.0       | C <sub>26</sub> H <sub>33</sub> O <sub>6</sub> Na  |

Figure S32. ESIMS (in-source fragmentation) spectrum of compound 4

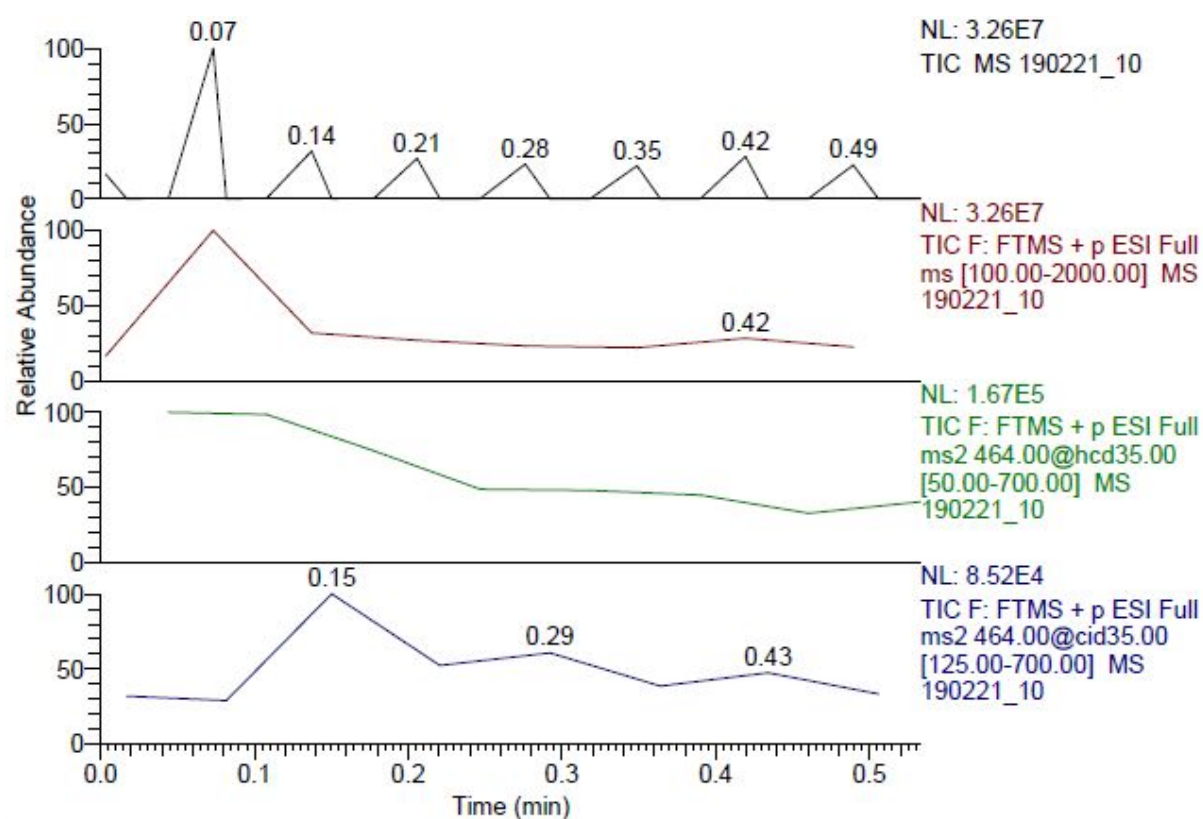

190221\_10 #6 RT: 0.11 AV: 1 NL: 4.21E4  
F: FTMS + p ESI Full ms2 464.00@hcd35.00 [50.00-700.00]

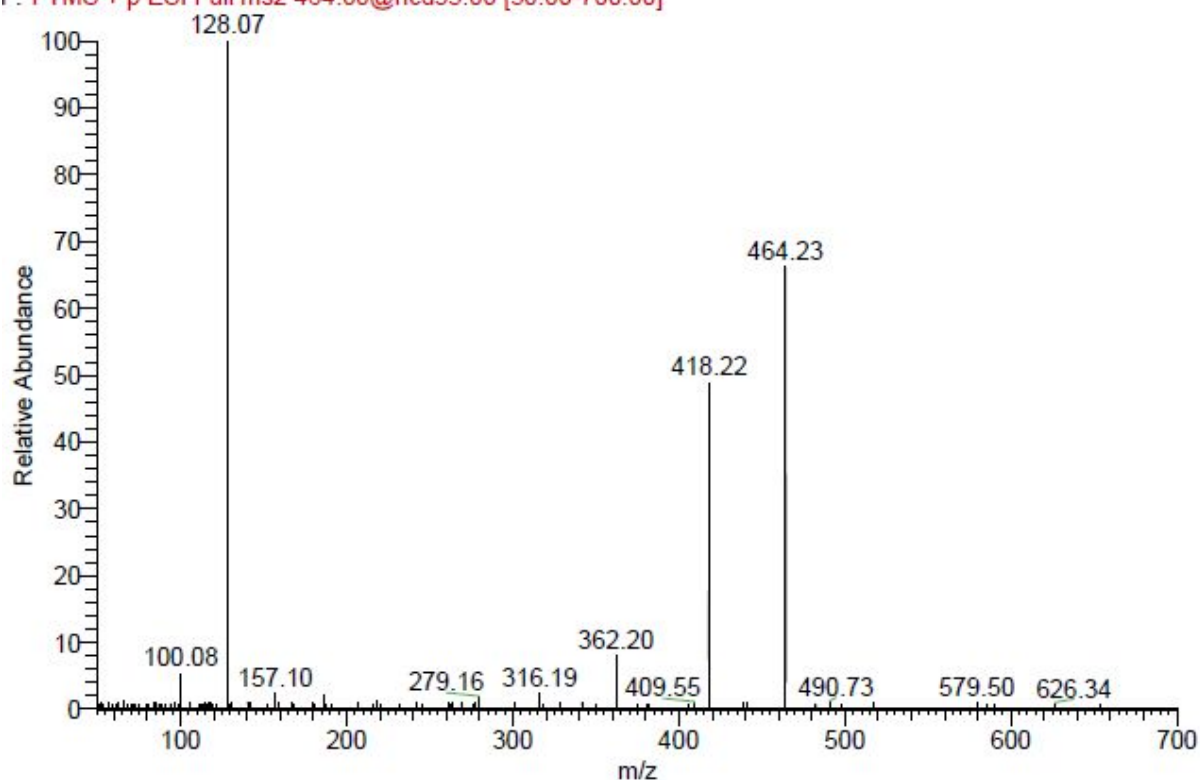

Figure S33.  $^1\text{H}$  NMR (600 MHz, DMSO) spectrum of the new compound 5

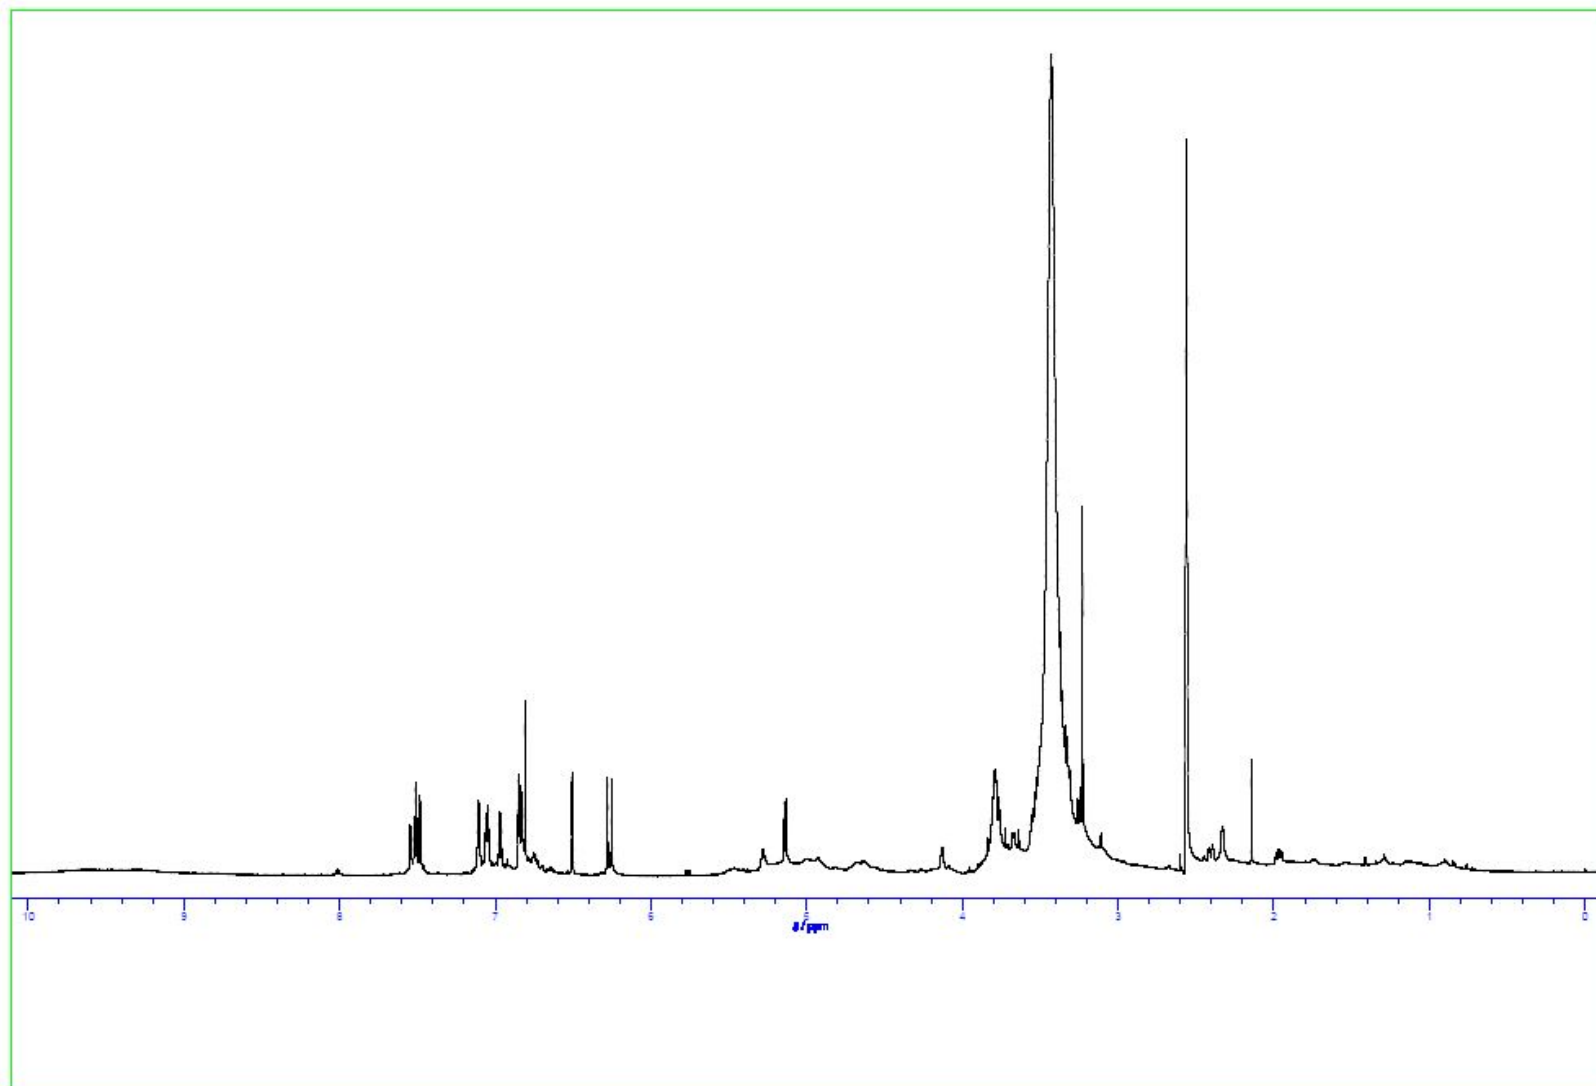

Figure S34.  $^{13}\text{C}$  NMR (150 MHz, DMSO) spectrum of the new compound 5

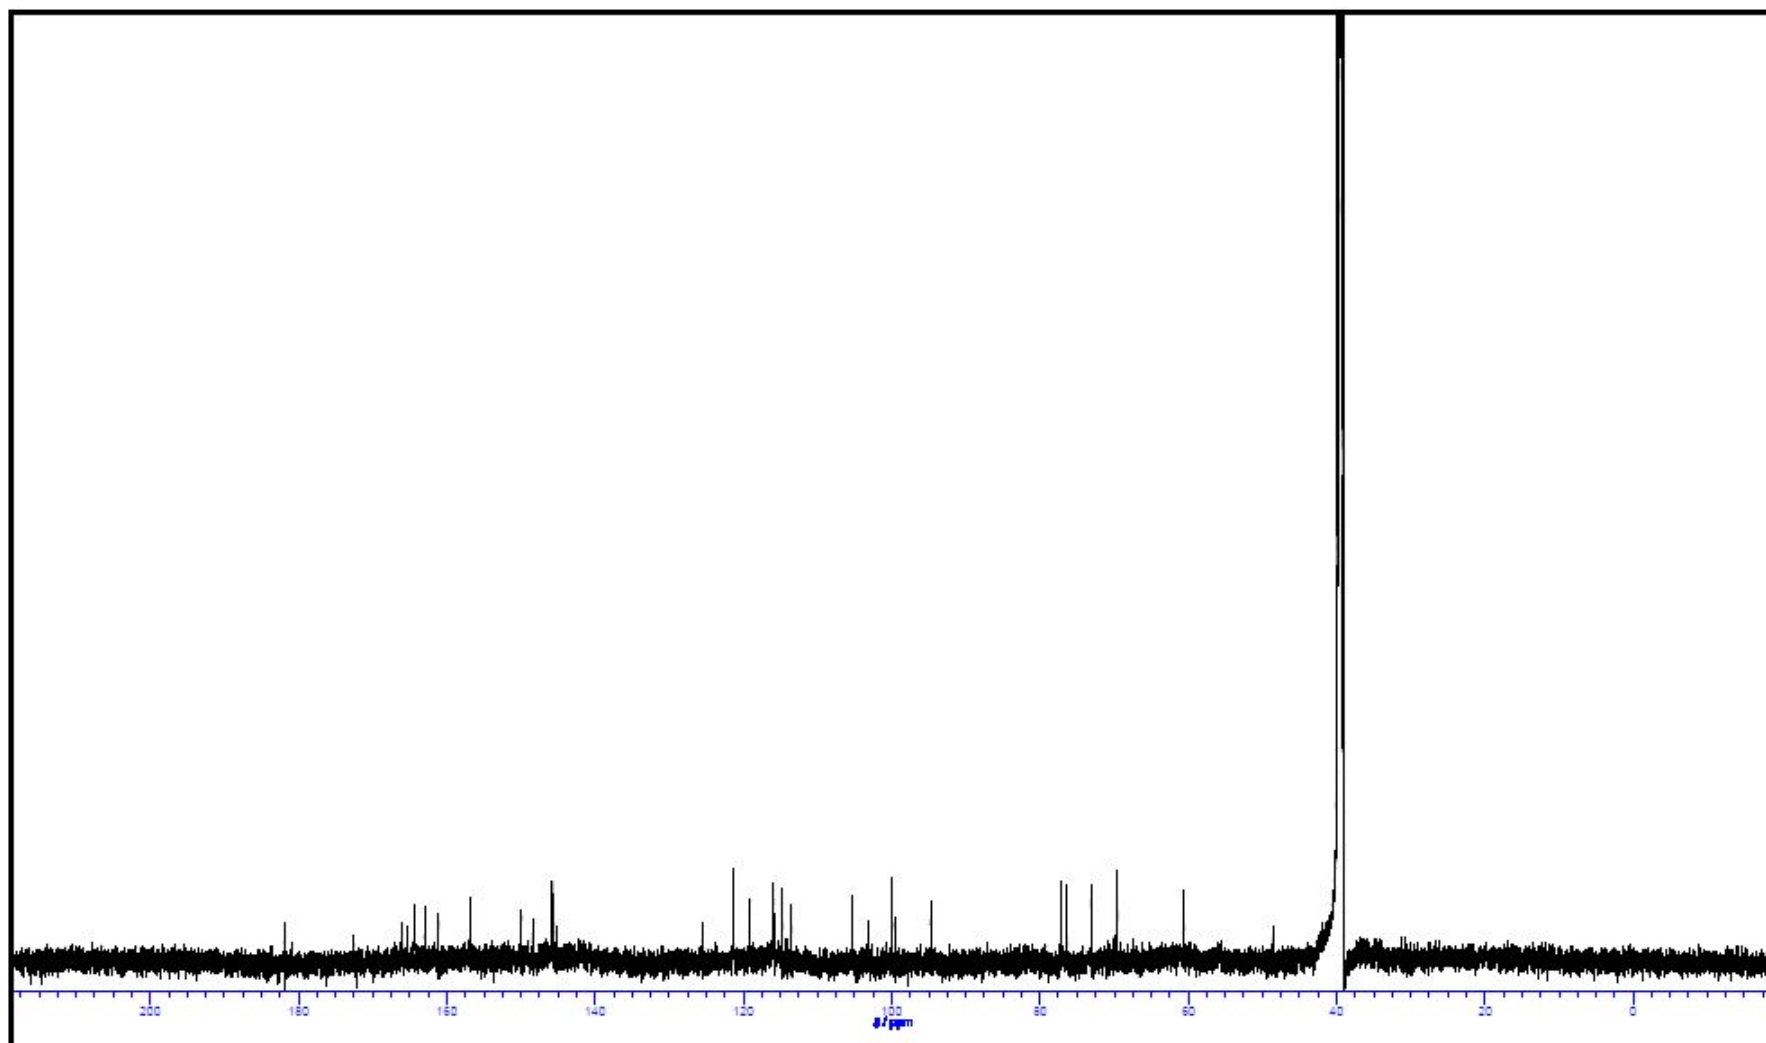

RT: 0.00 - 0.52

0.07 0.17 0.31 0.42

NL: 3.21E7  
TIC F: FTMS + p ESI Full ms [100.00-2000.00]  
MS 190121\_02

0.16 0.31 0.41

NL: 1.21E6  
TIC F: ITMS - c ESI Full ms [100.00-2000.00]  
MS 190121\_02

NL: 8.26E2  
TIC F: ITMS + c ESI d Full ms2  
136.06@cid35.00 [50.00-285.00] MS  
190121\_02

NL: 8.33E2  
TIC F: ITMS + c ESI d Full ms2  
139.07@cid35.00 [50.00-150.00] MS  
190121\_02

NL: 4.95E2  
TIC F: ITMS + c ESI d Full ms2  
143.00@cid35.00 [50.00-300.00] MS  
190121\_02

NL: 2.32E2  
TIC F: ITMS + c ESI d Full ms2  
157.08@cid35.00 [50.00-325.00] MS  
190121\_02

NL: 5.91E3  
TIC F: ITMS + c ESI d Full ms2  
158.96@cid35.00 [50.00-330.00] MS  
190121\_02

190121\_02 #4-9 RT: 0.04-0.07 AV: 2 NL: 2.12E6  
F: FTMS + p ESI Full ms [100.00-2000.00]

633.12

NL: 2.38E3  
TIC F: ITMS + c ESI d Full ms2  
185.07@cid35.00 [50.00-200.00] MS  
190121\_02

139.07 313.16 537.19 663.13 701.11 769.10 927.05 1243.25 1303.27 1579.29 1877.37

158.96 341.27 519.20

Relative Abundance

Time (min)

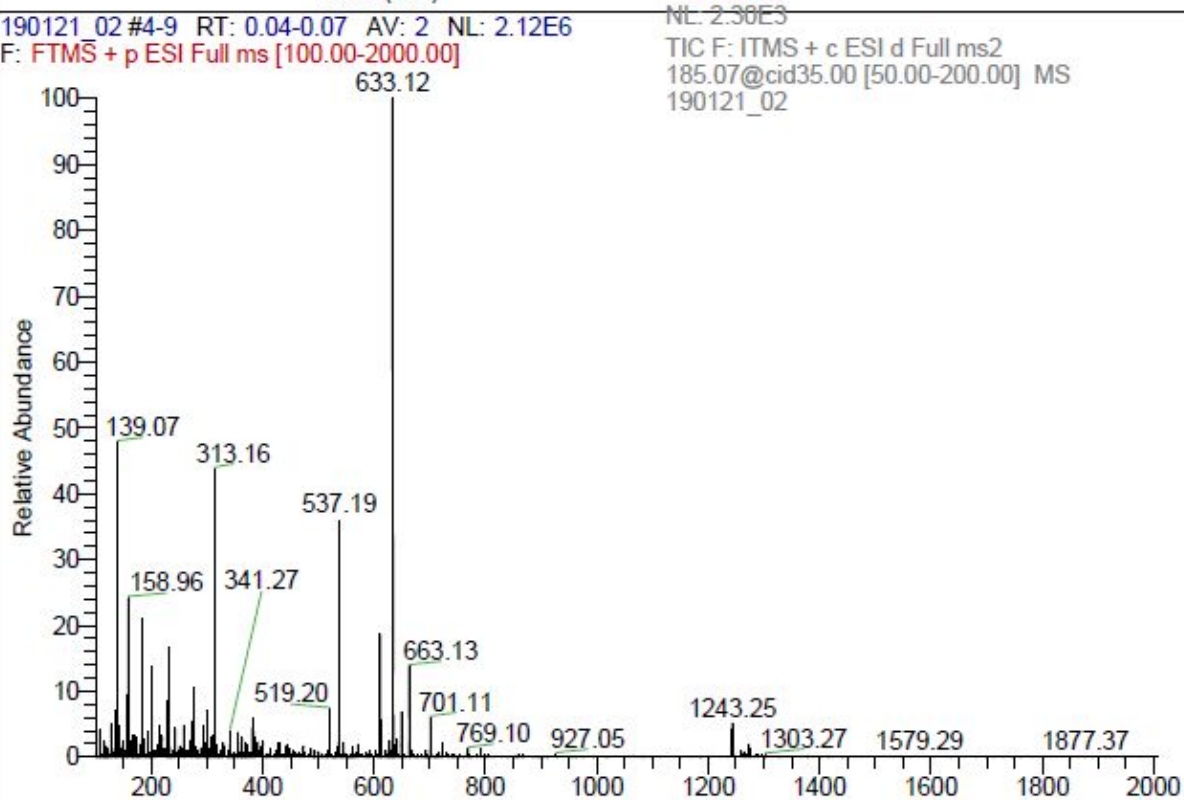

Figure S36. HRESIMS data of the new compound 5

Elemental composition search on mass 633.12

m/z= 628.12-638.12

| m/z      | Theo. Mass | Delta (ppm) | RDB equiv. | Composition                                                       |
|----------|------------|-------------|------------|-------------------------------------------------------------------|
| 633.1214 | 633.1215   | -0.19       | 23.0       | C <sub>29</sub> H <sub>20</sub> O <sub>9</sub> N <sub>7</sub> Na  |
|          | 633.1215   | -0.20       | 17.5       | C <sub>30</sub> H <sub>26</sub> O <sub>14</sub> Na                |
|          | 633.1212   | 0.24        | 21.5       | C <sub>28</sub> H <sub>21</sub> O <sub>12</sub> N <sub>6</sub>    |
|          | 633.1225   | -1.87       | 26.5       | C <sub>29</sub> H <sub>17</sub> O <sub>8</sub> N <sub>10</sub>    |
|          | 633.1225   | -1.88       | 21.0       | C <sub>30</sub> H <sub>23</sub> O <sub>13</sub> N <sub>3</sub>    |
|          | 633.1201   | 1.92        | 18.0       | C <sub>28</sub> H <sub>24</sub> O <sub>13</sub> N <sub>3</sub> Na |
|          | 633.1201   | 1.93        | 23.5       | C <sub>27</sub> H <sub>18</sub> O <sub>8</sub> N <sub>10</sub> Na |
|          | 633.1199   | 2.36        | 22.0       | C <sub>26</sub> H <sub>19</sub> O <sub>11</sub> N <sub>9</sub>    |
|          | 633.1188   | 4.04        | 18.5       | C <sub>26</sub> H <sub>22</sub> O <sub>12</sub> N <sub>6</sub> Na |
|          | 633.1185   | 4.48        | 17.0       | C <sub>25</sub> H <sub>23</sub> O <sub>15</sub> N <sub>5</sub>    |
